# HER2 Cellular Localization, Cell-Cell Contacts, and Cell Density Regulate Cancer Cell Plasticity in HER2+ Breast Cancer

Saba Sameri<sup>1</sup>, Durdam Das<sup>2</sup>, Shabnam Shahrivari<sup>1</sup>, Vladan Milosevic<sup>3</sup>, Shamim Sarhadi<sup>4</sup>, Huiqin Koerkel-Qu<sup>1</sup>, Carolina Fisch<sup>1</sup>, Miriam Kokal<sup>1</sup>, Michael Schletter<sup>5</sup>, Paul S. Hahn<sup>1</sup>, Lisa Seider<sup>6</sup>, Marisa Schübel<sup>1</sup>, Stefanie Michaelis<sup>7</sup>, Joachim Wegener<sup>7,8</sup>, Florian Weber<sup>9</sup>, Martin Hoffmann<sup>2</sup>, Christian Werno<sup>2</sup>, Kathrin Weidele<sup>2</sup>, Astrid Bruckmann<sup>10</sup>, Arne Östman<sup>3</sup>, Ernst R. Tamm<sup>11</sup>, Yuting Li<sup>12</sup>, Christoph A. Klein<sup>1,2</sup>, Hedayatollah Hosseini<sup>1</sup>

1 Experimental Medicine and Therapy Research, University of Regensburg, Germany

2 Fraunhofer Institute for Toxicology and Experimental Medicine ITEM, Regensburg, Germany

3 Centre for Cancer Biomarkers CCBIO, Department of Clinical Medicine, University of Bergen, Norway

4 Institute of Clinical Chemistry and Pathobiochemistry, Technical University of Munich, Germany

5 Department of Medicine– Hematology/Oncology, University Hospital Erlangen, Germany

6 Department of Evolutionary Developmental Biology, Institute of Zoology, University Innsbruck, Austria

7 Fraunhofer Institute for Electronic Microsystems and Solid State Technologies EMFT, Regensburg, Germany

8 Institute of Analytical Chemistry, University of Regensburg, Germany

9 Institute of Pathology, University of Regensburg, Germany

10 Institute for Biochemistry, Genetics and Microbiology (Biochemistry I), University of Regensburg, Germany

11 Department of Human Anatomy and Embryology University of Regensburg, Germany

12 Wuya College of Innovation, Shenyang Pharmaceutical University, ShenYang, China

35 **Abstract:**

36 Phenotypic plasticity in HER2+ breast cancer presents a significant challenge in comprehending and  
37 treating early-stage metastasis. We conducted an extensive study employing *in vitro* models and  
38 patient samples to investigate the relationships among cell density, HER2 expression, HER2 cellular  
39 localization, and their impact on the plasticity program of HER2+ breast cancer cells.

40 Our research reveals a previously unexplored facet of HER2+ breast cancer biology. In  
41 conditions of low cellular density, the endoplasmic reticulum (ER) undergoes a remarkable  
42 transformation, shifting its function from protein trafficking to serving as a regulator of calcium flux via  
43 the PLC pathway. This alteration in ER function leads to the accumulation of HER2 protein within the  
44 perinuclear ER compartment.

45 Furthermore, we discovered that in situations of low cellular density or loss of cell-cell contact  
46 among epithelial cells, an epithelial-to-mesenchymal transition (EMT) program is activated, resulting  
47 in a significant upregulation of desmosome junctions. Desmosome junctions persist as the longest-  
48 lasting epithelial cell junctions on the cell surface and represent the primary means for solitary  
49 epithelial cells to establish initial contact. Notably, our research revealed a physical binding between  
50 HER2 and Desmoplakin (DSP), facilitating HER2 membrane localization upon early cell-cell contact that  
51 initiates the proliferation of cancer cells. The switching from migration to proliferation hinges on a  
52 competition between the HER2 membrane pathway and the PLC pathway for the shared target  
53 molecule, PIP2. Upon HER2 membrane localization, the PI3K pathway is activated, converting PIP2 to  
54 PIP3. Simultaneously, HER2 activation upregulates PDPK1, whose PH domain exhibits a high binding  
55 affinity to PIP2 molecules. Consequently, membrane localization of HER2 substantially diminishes PIP2  
56 availability for the PLC pathway, redirecting cells toward proliferation. Analysis of patient samples  
57 confirms the loss of membrane bound HER2 in circulating tumor cells (CTCs) and highlights phenotypic  
58 transitions in solitary cancer cells. These cells are characterized by increased plakoglobin, elevated  
59 ZEB1, and reduced KI67 protein levels.

60 In summary, our findings introduce a novel mechanism of phenotypic plasticity in HER2+  
61 breast cancer that regulates phenotype switching. This mechanism holds promise for the interception  
62 of early-stage metastasis, potentially leading to improved outcomes for HER2+ breast cancer patients.

63

64 Keywords: HER2, phenotypic plasticity, desmosome junctions, PDPK1, breast cancer, metastasis.

65

66

67

68

69

70

71

72

73

## 74 Introduction

75 In recent years, a growing body of research has illuminated the concept of early cancer dissemination,  
76 challenging traditional notions of metastasis (1, 2). This paradigm shift underscores the notion that  
77 cancer cells may disseminate at an earlier stage, co-evolving alongside primary tumors and eventually  
78 giving rise to metastases. This shift has raised a pivotal question: How can we shift our focus toward  
79 preventing metastasis when we lack drugs specifically targeting Disseminated Tumor Cells (DTCs) or  
80 Circulating Tumor Cells (CTCs) (1).

81 To answer this question effectively, a comprehensive understanding of the biology of cancer  
82 dissemination and the molecular mechanisms governing cancer cell dissemination and early  
83 colonization is essential. Our previous research into the BALB-neuT murine model has shed light on  
84 this matter. We observed a strong correlation between the expression level of the HER2 oncoprotein,  
85 cellular density, and cancer cell migration, dissemination, and proliferation capabilities (3, 4). Notably,  
86 lower HER2 expression in low-density cancer cell lines or early BALB-neuT lesions correlated with  
87 increased migration and sphere formation abilities. Conversely, HER2 upregulation and high cellular  
88 density was associated with a higher proliferation rate in advanced tumors (3, 4).

89 Traditionally, the Epithelial-Mesenchymal Transition (EMT) and Mesenchymal-Epithelial  
90 Transition (MET) program has been the focal point of discussions on cancer cell plasticity (5). However,  
91 recent studies have highlighted the role of cell density in regulating epithelial cell migration and  
92 proliferation abilities (6-8). This aspect had been previously overlooked by classical EMT regulators.  
93 During EMT, changes in the expression of genes encoding adhesion molecules impact cell-cell and cell-  
94 ECM interactions (9). Remarkably, even without external EMT inducers, cell density induces the loss of  
95 cell-cell adhesion in epithelial cells, leading to increased motility (10) inducing EMT program (11) and  
96 enhancing the potential for vascular invasion (3, 4).

97 While HER2 overexpression in breast cancer cells is known to promote proliferation (12),  
98 limited knowledge exists regarding the correlation between oncogene expression levels and different  
99 cancer cell phenotypes. Notably, three independent studies consistently reported that robust  
100 activation of oncogenic pathways, including c-Myc overexpression in human metastatic breast cancer  
101 cells(13), simultaneous activation of Akt-1 and HER2 in HER2 murine breast cancer cells (14) and  
102 activation of K-Ras in the intestinal adenocarcinoma mouse model (APC-/- /K-Ras wt/mut(V12))(15),  
103 leads to increased proliferation while reducing cancer motility and metastatic ability. These findings  
104 beside other cumulative reports suggest that cancer cell dissemination, a critical facet of metastasis,  
105 may necessitate a transition from a proliferative to an invasive state(16).

106 HER2, a key oncogene driving 20% of breast cancers, known as HER2 subtypes(17), also plays  
107 a pivotal role in the progression of other breast cancer subtypes (18-20), as well as ovarian and cervical  
108 cancers (21) and gastric cancer(22). This underscores its essential role and potential as a target for  
109 cancer therapies. Another intriguing observation about HER2 is the non-membrane staining of HER2  
110 protein in breast cancer as well as other cancer types and its correlation with worse clinical outcomes  
111 (19, 21, 22). Furthermore, studies have demonstrated that HER2 mRNA or protein levels, are markedly  
112 dysregulated in disseminated cancer cells in breast cancer patients with positive HER2 status of their  
113 primary tumors (23-26).

114 In light of these observations, we postulate the existence of a plasticity mechanism regulating  
115 cancer cell phenotypic switches at the time of dissemination and colonization. This mechanism

116 involves cancer cell density, HER2 expression, and the cellular localization of HER2—topics we aim to  
117 investigate in this study.

118 In this investigation, we employ a combination of *in vitro* modeling to manipulate HER2  
119 expression levels and vary cell density conditions. This approach allows us to delve into the regulation  
120 of cancer cell phenotypic transitions based on the cellular localization of HER2. Under low-density (LD)  
121 conditions, alterations in endoplasmic reticulum (ER) function, specifically related to protein trafficking  
122 and calcium flux via the PLC pathway, lead to HER2 accumulation within ER compartments, hindering  
123 cell proliferation. As early cell-cell contact is initiated, primarily mediated by desmosome junctions,  
124 the DSP protein, with a physical binding to HER2 proteins, localizes to the cell membrane, subsequently  
125 triggering cell proliferation. The activation of the HER2 pathway involves the utilization and occupancy  
126 of PIP2 molecules, which, in turn, inhibits the PLC pathway, suppressing the migration properties of  
127 cancer cells. These findings, in conjunction with patient data, present compelling evidence for a novel  
128 cancer cell plasticity mechanism within breast cancer, elucidating the dynamics of phenotypic  
129 transitions in disseminated cancer cells.

130

## 131 **Results**

### 132 **Cell density state, HER2 expression level, and HER2 cellular localization are correlated to the** 133 **cancer cell phenotypic switch:**

134 In our prior investigation utilizing the BALB-neuT breast cancer model, a significant disparity in  
135 dissemination ability was observed between early lesion (EL) cells and primary tumor (PT) cells (3). EL  
136 cells demonstrated a notably higher capacity for dissemination compared to PT cells. Conversely, PT  
137 cells exhibited elevated proliferative rates. Subsequent experiments were conducted, encompassing  
138 primary lesions from the BALB-neuT mouse model and human HER2+ (HER2 IHC scores +1, +2, and +3)  
139 breast PT samples. These investigations revealed a distinctive pattern: solitary cancer cells which were  
140 found to be detached from the epithelial structures and detected by cytokeratin staining (CK8/18),  
141 exhibited non-membrane HER2 staining (Figures 1A-B). Further investigation included an *in vitro*  
142 invasion assay utilizing a Boyden chamber coated with 40% matrigel. Cells isolated from EL lesions of  
143 BALB-neuT mice were seeded at a density of 50,000 cells per 24 well inserts, with FCS-free medium  
144 above and FCS-containing medium below the chamber. Notably, the *in vitro* invasion assay revealed  
145 migrating cells on the opposite side of the Boyden chamber's membrane, with HER2 staining notably  
146 absent from the cell membrane. Instead, HER2 was exclusively localized to the cell-cell contact surface  
147 (Figure 1C).

148 Building upon our previously reported findings, which demonstrated that EL cells disseminate  
149 more than PT cells, we hypothesized that the number of cell-cell contacts and cancer cell density might  
150 be associated with the higher proliferation rates observed in PT cells as compared to EL lesions. Our  
151 cytokeratin (CK8/18) staining supported this hypothesis, as it indicated that cells within PT lesions  
152 formed denser epithelial structures in both murine (Figures 1D and E) and human samples (Figures S1A  
153 and B). Notably, cells within these dense structures exhibited more pronounced proliferative features  
154 in Ki67 staining in both murine (Figure 1F) and human samples (Figure S1C).

155 Subsequently, we examined the membrane localization of HER2 in breast cancer cells in  
156 relation to varying cancer cell densities. To accomplish this, we selected various cell lines with different  
157 HER2-expression profiles (Figure S1D) and evaluated HER2 localization under different cell culture  
158 density conditions. Our results demonstrated that in cell lines with low to moderate HER2 expression

159 levels (e.g., MCF7 and T47D for human cell lines, and 4T1 and TUBO for murine cell lines; 72 hours  
160 culturing), HER2 was localized to the cytoplasmic-nuclear compartment at low cellular densities (500  
161 cells/cm<sup>2</sup>) but localized to the cell membrane at high cellular densities (20000 cells/cm<sup>2</sup>) (Figures 1G  
162 and S1E). Immunoblotting for the cytoplasmic and nuclear fractions of MCF7 cells under low and high-  
163 density conditions was also performed to validate the presence of HER2 in the nuclear fraction of cells  
164 cultured at low-density conditions (Figures S1F). However, cellular localization of HER2 was not  
165 observed in low density for cell lines with strong HER2 expression (e.g., MDA-MB453, SKBR3; 72 hours  
166 culturing) (Figures 1H and S1G).

167 In summary, these results collectively suggest the presence of a cancer cell plasticity  
168 mechanism, which involves cell-cell contact, cell density, and HER2 expression levels. This mechanism  
169 plays a pivotal role in regulating HER2 cellular localization and influencing the phenotypic switch in  
170 cancer cell migration and proliferation.

171

### 172 **HER2 expression level and cell density regulates plasticity program of mammary and breast** 173 **cancer cells:**

174 Investigating changes in HER2 cellular localization under varying cell densities, which subsequently led  
175 to distinct cell phenotypes, prompted our exploration into the impact of HER2 expression on  
176 localization and phenotypic transitions. To address this, we established a Tet-On HER2 inducible model  
177 incorporating an eGFP tag for tracking HER2 expression and cellular localization in MCF10A cells,  
178 denoted as MCF10A-Teti-HER2\_GFP (Figure S2A). In this model, Doxycycline (Dox), a stable derivative  
179 of Tetracycline, induces HER2 expression, which is trackable through GFP. By modulating HER2  
180 expression levels at different cell densities, we observed that HER2 localizes to the cell membrane at  
181 high density (HD) and around the nucleus at low density (LD) (Figure 2A and B). Furthermore, we  
182 assessed HER2 and eGFP mRNA levels through quantitative PCR (qPCR), confirming the model's dose-  
183 dependent response to Dox (Figure S2B and C). Subsequently, we conducted immunoblotting of  
184 cytoplasmic and nuclear fractions from MCF10A-Teti-HER2\_GFP cells treated with 1  $\mu$ M Dox under HD  
185 and LD conditions for 72 hours. These analyses revealed higher HER2 expression in the LD nuclear  
186 fraction relative to the HD condition, aligning with findings from immunoblotting in MCF7 cells (Figure  
187 S1D) (Figure 2C).

188 Inducing HER2 expression in MCF10A-Teti-HER2\_GFP cells under LD conditions notably  
189 enhanced the cell proliferation pathway, evidenced by elevated levels of p-AKT, p-PDPK1, and p-ERK  
190 in immunoblotting, increased cell counts, and XTT assay results (Figure 2D-E and S2D). Conversely,  
191 upregulating the cell proliferation pathway by increasing HER2 expression resulted in decreased  
192 migration ability of MCF10A-Teti-HER2\_GFP cells, as demonstrated in cell motility assays (Figure 2G).  
193 These phenotypic transitions were further evidenced by altered expression levels of migration and  
194 proliferation markers at constant HER2 expression (1  $\mu$ M Dox) under different cell densities, including  
195 reduced Ki67 and PCNA expression but increased MMP9, MMP14, and FN1 levels in LD (Figure S2E).

196 Moreover, HER2 membrane localization of MCF10A-Teti-HER2\_GFP cells increased with  
197 elevated HER2 expression by Dox treatment after 72 hours culturing (Figure 2H), consistent with  
198 findings in the MCF7 cell line, where increased cell density increased HER2 membrane localization  
199 (Figure S2F).

200 To confirm that these results were not influenced by the eGFP tag on HER2, we generated a  
201 non-GFP tagged MCF10A-Teti-HER2 model, which corroborated our primary findings from the  
202 MCF10A-Teti-HER2\_GFP model, thus strengthening our results (Figure S2G-K).

203 Observing reduced cell motility and induced cell proliferation with increased HER2 expression  
204 and cell density, we postulated that HER2 expression level and cell density might jointly regulate the  
205 epithelial-mesenchymal transition (EMT) state of these cells. To investigate this, we examined the EMT  
206 profile of MCF10A-Teti-HER2\_GFP cells under different Dox concentrations (72 hours of culturing).  
207 Interestingly, we found that increasing HER2 expression and cell density reduced the mesenchymal  
208 state of cells (Figure 2I and J).

209 To ascertain whether the reduction of the mesenchymal state resulted solely from increased  
210 cell density induced by HER2 expression (Figure 2F-I) or if HER2 expression level played a role, we  
211 treated MCF10A-Teti-HER2\_GFP cells in LD conditions with Dox and/or TGF- $\beta$  as classical inducer of  
212 mesenchymal phenotype. Our findings indicated that TGF- $\beta$  (TGF-  $\beta$ 1, 5 ng/ml; refreshing every 24  
213 hours for three days), treatment in low density conditions induced a pronounced mesenchymal  
214 phenotype. Co-treatment of cells with TGF- $\beta$  and Dox revealed that the mesenchymal state of cells  
215 remained stable (Figure 2K). This experiment clarified that HER2 expression level alone does not  
216 regulate the mesenchymal state of cells. To investigate the impact of cell density alone on the  
217 regulation of the mesenchymal state of cells, we cultured MCF10A-Teti-HER2\_GFP cells at constant  
218 HER2 expression (1  $\mu$ M Dox) in LD conditions and tracked the phenotypic traits over extended culturing  
219 periods. Remarkably, cell density primarily governed the mesenchymal phenotype of cells, with this  
220 effect becoming more pronounced after 15 days compared to 3 days of culturing in low density  
221 conditions (Figure 2L). Comparable results were observed for other human breast cancer cell lines  
222 including HCC-1806, MCF7 and T47D (Figure S2L).

223 In summary, these results underscore the pivotal roles played by HER2 expression level and  
224 cell density in governing HER2 cellular localization and contributing to phenotypic switch in cancer  
225 cells.

226

### 227 **Desmosome junctions initiate HER2 membrane localization in the early cell-cell contacts:**

228 Our investigation has shed light on the pivotal role of HER2 cellular localization in orchestrating cancer  
229 cell phenotypes. We have revealed that cell density and cell-cell contact are fundamental factors  
230 affecting the cellular localization of HER2. To delve deeper into the involvement of cell junctions in this  
231 process, we conducted a comprehensive series of experiments and investigations.

232 Initially, we observed that when MCF10A-Teti-HER2\_GFP cells were treated with 1  $\mu$ M Dox  
233 and cultured in high-density (HD) conditions with cell-cell contact, a distinct membrane localization of  
234 HER2 emerged at the cell-cell contact surface (Figure 3A). This intriguing observation led us to  
235 formulate a hypothesis that cell-cell contact might play a crucial role in the membrane localization and  
236 stabilization of HER2. To further investigate this hypothesis, we meticulously examined the HER2  
237 cellular position in solitary cells derived from 32 primary tumor samples of HER2+ breast cancer cells  
238 (HER2 IHC scores 1+, 2+, 3+). Remarkably, our analysis revealed a direct correlation between the  
239 number of cell contacts and HER2 membrane localization in these cells (Figure 3B).



240 In a separate experiment, we subjected SKBR3 cells to a non-adherent condition using ultra-  
241 low adherent culturing plates and inhibited cluster formation by employing shaking incubators  
242 (70rpm). Remarkably, after 48 hours, we made the striking observation that HER2 had disappeared  
243 from the cell membrane, underscoring the pivotal role of cell junctions in stabilizing membrane-bound  
244 HER2 (Figure 3C-D). Interestingly, reducing cell-membrane HER2 was sufficient to restore the cellular  
245 localization of HER2, a phenomenon not previously observed in strongly HER2-expressing cells. Our  
246 quantification results, which correlate the HER2 staining signal with DAPI as a nuclear staining  
247 indicator, demonstrated a strong correlation between these two staining signals in the nuclear and  
248 endoplasmic (NER) regions of SKBR3 cells only 6 hours after seeding for cells that had undergone 48  
249 hours of contact inhibition (Figure 3E). In line with the concept of non-membrane HER2 triggering a  
250 phenotypic change, cytoplasmic localization of HER2 in SKBR3 cells led to a reduction in their  
251 proliferation ability, as indicated by Ki67 staining results (Figure S3A).

252 To explore potential protein binding partners involved in HER2 cellular localization, we  
253 conducted immunoprecipitation experiments under both low-density (LD) and HD conditions. We  
254 utilized MCF10A-Teti-HER2\_GFP cells treated with 1  $\mu$ M Dox and SKBR3 cells (for SKBR3 LD cells, cells  
255 were collected 6 hours culturing of cells undergo cell contact inhibition conditions for 48 hours). Mass  
256 spectrometric analysis consistently identified desmosome junction components, particularly  
257 Desmoplakin (DSP) and Vimentin (VIM), as binding partners of HER2 across LD and HD conditions  
258 (Figure 3F and S3B-C). Co-immunoprecipitation experiments in MCF10A-Teti-HER2\_GFP cells treated  
259 with 1  $\mu$ M Dox under medium density (10,000 cells/cm<sup>2</sup>) conditions for 72 hours confirmed the physical  
260 interaction of HER2 with DSP and VIM proteins (Figure 3G). Notably, no binding was observed for  $\alpha$   
261 and  $\beta$  Catenin proteins, which share a role similar to DSP in the formation of primary junctions in  
262 epithelial cells (Figure S3D). Interestingly, we found that mRNA expression level of desmosome  
263 junctions, rather than tight or adherent junctions, were upregulated in MCF10A-Teti-HER2\_GFP cells  
264 treated with 1  $\mu$ M Dox after 3 days of culture under LD conditions. Our qPCR expression analyses  
265 revealed that desmosome junctions represented more stable cell junctions compared to tight and  
266 adherent junctions, although they gradually lost their expression profile during long-term culture (15  
267 days) (Figure S3E).

268 Subsequently, we aimed to simulate the route of cancer cell dissemination by creating a mixed  
269 culture environment that included MCF10A-Teti-HER2\_GFP cells along with various cell types and  
270 extracellular matrix (ECM) conditions. Our objective was to explore the potential of cell contacts in  
271 inducing HER2 membrane localization in MCF10A-Teti-HER2\_GFP cells. Intriguingly, our findings  
272 demonstrated that certain epithelial cell lines possessed the ability to facilitate HER2 localization to  
273 the cell membrane of MCF10A-Teti-HER2\_GFP cells after 24 hours of co-culture, while others lacked  
274 this capability (Figure 3H and I). Notably, mRNA expression analyses of these cells indicated higher  
275 expression levels of desmosome junction surface cadherin molecules (DSC1-3 and DSG1-3) in cells that  
276 had a greater capacity to facilitate HER2 localization to the membrane compared to those lacking this  
277 ability (Figure 3J). It seems that increased desmosome cadherin protein expression increases stickiness  
278 of cancer cells to initiate cell contact.

279 To deepen our understanding of the role of desmosome junctions and DSP in regulating HER2  
280 membrane localization and initiating proliferation, we executed a DSP siRNA knockdown in MCF10A-  
281 Teti-HER2\_GFP cells and cultured them under both low and high cellular densities. While DSP  
282 knockdown had no evident impact on cell proliferation in HD (Figure S3F), it markedly diminished cell-

283 cell contact and proliferation in LD conditions (Figure 3K). Furthermore, the intensity of HER2 and DSG2  
284 decreased at the cell contact surfaces of contacting cells upon DSP knockdown (Figure 3L).

285 In summary, our results strongly suggest the involvement of desmosome junctions, particularly  
286 DSP, in regulating HER2 membrane localization and initiating proliferation. This mechanism holds  
287 significant implications for our understanding of cancer cell colonization at distant sites.

288

### 289 **Changing on the function of endoplasmic reticulum (ER) accumulates HER2 inside of the cells** 290 **in low density:**

291 As HER2 expression levels were found to be higher in the nuclear fraction of LD compared to HD  
292 MCF10A-Teti-HER2\_GFP (1  $\mu$ M Dox) and MCF7 cells (Figure S1D and 2C), we aimed to investigate the  
293 precise cellular localization of HER2 when it is not present in the membrane. To achieve this, we  
294 conducted confocal imaging, which revealed that HER2 was located not within the nucleus but in close  
295 proximity to the nucleus (Figure 4A). Notably, the nuclear envelope, comprised of a double membrane  
296 bilayer originating from the endoplasmic reticulum (ER) membrane, forms the most obvious boundary  
297 around the nucleus. Hence, we cultured MCF10A-Teti-HER2\_GFP cells at both low (2000 cells/cm<sup>2</sup>) and  
298 high (20000 cells/cm<sup>2</sup>) cellular densities for 72 hours and stained them with an ER tracking dye marker.  
299 The results demonstrated a strong correlation between HER2 and the ER in LD, but not in HD (Figure  
300 4B-C). Furthermore, we developed a cell organelle fractionation protocol (see methods) and showed  
301 that the nuclear/cytoplasmic accumulation of HER2 (NER) correlates with the fraction enriched in  
302 calnexin (CLNX) protein, a typical marker for the ER organelle (Figure S4A).

303 Previous studies have established that ER membranes are physiologically active, interacting  
304 with the cytoskeleton and containing specialized domains for distinct functions. Among these  
305 functions, two critical roles of the ER are regulating calcium ion gradients for cell migration (27) and  
306 participating in protein trafficking (28). To investigate the role of the ER in HER2 localization concerning  
307 protein trafficking, we treated MCF10A-Teti-HER2\_GFP (1  $\mu$ M Dox) and MCF7 cells at moderate density  
308 (2500 cells/cm<sup>2</sup> for MCF7 and 10000 cells/cm<sup>2</sup> for MCF10A-Teti-HER2\_GFP) with Brefeldin A (BFA; 50  
309  $\mu$ g/ml) for 24 hours, an agent inhibiting protein trafficking from the ER to the Golgi apparatus. We  
310 observed that BFA-treated cells exhibited increased non-membrane (correlation to NER) HER2 levels,  
311 and a higher number of single cells compared to the control (Figure 4D and S4B). Due to its strong  
312 toxicity impact on cells, we excluded proliferation and migration functional experiments for the BFA  
313 treatments. Furthermore, we examined the involvement of RAB1A (a small GTPase regulating vesicle  
314 traffic from the ER to the Golgi apparatus) and SEC24A (a component of COPII-coated vesicles  
315 mediating protein transport from the ER) (Figure S4C). The protein expression levels of both markers  
316 increased upon HER2 activation. Moreover, RAB1A expression was upregulated in HD compared to LD,  
317 indicating a decrease in protein trafficking function in the ER due to reduced cell density (Figure S4D).

318 Another important role of the ER, particularly in cell migration, is providing calcium ions at the  
319 leading edge of the cell, essential for cell movement (27). This function is tightly regulated by the  
320 phospholipase C (PLC) protein (29). To investigate the role of the ER and PLC in regulating HER2 cellular  
321 localization, we seeded MCF10A-Teti-HER2\_GFP (1  $\mu$ M Dox) and MCF7 cells at LD (500 cells/cm<sup>2</sup> for  
322 MCF7 and 2000 cells/cm<sup>2</sup> for MCF10A-Teti-HER2\_GFP) and treated them with 1  $\mu$ M of a PLC inhibitor  
323 for 6 hours followed by a 24-hour incubation. We observed that pharmacological inhibition of PLC  
324 caused an increase in HER2 membrane localization, resulting in increased cell proliferation and



325 decreased cell motility (Figure 4E and S4E). Furthermore, the protein expression levels of PLC and p-  
326 PLC decreased in MCF10A-Teti-HER2\_GFP HD cells (Figure S4F). Additionally, we indirectly disrupted  
327 PLC function by treating MCF10A-Teti-HER2\_GFP and MCF7 cells (2000 cells/cm<sup>2</sup> for MCF7 and 10000  
328 cells/cm<sup>2</sup> for MCF10A-Teti-HER2\_GFP) with 0.5 mM of EGTA, a calcium ion chelating agent. After 24  
329 hours of treatment, HER2 was released from perinuclear structures (Figure S4G). Due to its strong  
330 toxicity impact on cells, we excluded proliferation and migration functional experiments for the ETGA  
331 treatments. Moreover, we analyzed the arrangement of cell organelles within MCF7 cells as single  
332 migratory cells compared to cells in compact structures using transmission electron microscopy. We  
333 found that the soft-ER, responsible for providing calcium ions at the leading edge of migratory cells  
334 (30) was polarized towards the leading membrane edge of cells compared to cells within compact  
335 structures in HD (Figure 4F).

336 In conclusion, we have determined that the function of the ER shifts between protein  
337 trafficking and calcium ion flux depending on cell density. Under LD conditions, the protein trafficking  
338 function of the ER is diminished, leading to HER2 accumulation in ER structures. The primary function  
339 of the ER in LD is the regulation of calcium through the PLC pathway at the leading edge of migrating  
340 cells.

#### 341 **Competition between PLC and PDK1 regulates switches between migration or proliferation** 342 **phenotype:**

343 Once HER2 is positioned on the cell membrane and stabilized, it can activate the PI3K pathway.  
344 Subsequently, PI3K converts PIP2 to PIP3. PIP3 can then bind to proteins containing PH domains,  
345 triggering proliferation (31). On the other hand, some of the PH domain proteins in the HER2-PI3K  
346 pathway have a certain degree of affinity for PIP2 (31, 32), which is the primary substrate targeted by  
347 the PLC pathway (31). In the low-density condition, we observed the activation and significance of the  
348 PLC pathway. Consequently, we postulated that there might be competition for PIP2 binding/usage  
349 between PLC and PI3K pathways. Specifically, in this scenario, the PI3K pathway utilizes PIP2 and  
350 converts it into PIP3. Furthermore, under high-density (HD) or high-HER2-expression conditions, there  
351 is an upregulation of PH domain proteins within the PI3K pathway. This upregulation may lead to an  
352 increased occupancy of PIP2 molecules, potentially resulting in the inactivation of the PLC pathway.  
353 Consequently, this competitive relationship between the two pathways could serve as a fundamental  
354 molecular switch that influences the balance between cellular proliferation and migration.

355 To test this hypothesis, we conducted immunostaining for PIP2 and PIP3 in MCF10A-Teti-  
356 HER2\_GFP cells treated with 1 $\mu$ M Dox. The results revealed a depletion of PIP2 at the cell-cell contact  
357 surface where HER2 localizes to the membrane (Figure 5A-B). PIP3 staining exhibited partial overlap  
358 with HER2 staining, although the results were not as distinct as the PIP2 staining (Figure S5A).

359 To determine if PH domain proteins are upregulated or co-regulated with HER2 expression, we  
360 assessed the protein expression of PDK1, AKT1, AKT2, AKT3, and SIN1 in MCF10A-Teti-HER2\_GFP cells  
361 treated with Dox. We observed an upregulation/co-regulation of protein expression for AKT1, AKT3,  
362 SIN1, and PDK1 along with HER2 expression (Figure 5C).

363 Subsequently, we performed a Protein-Lipid Overlay assay (PLO), in which we incubated PH  
364 domain peptides of candidate proteins with fixed PIP2 spots on immunoblotting papers. Our results  
365 indicated that both Sin1 and PDK1 can bind to PIP2, with PDK1 showing a concentration-dependent  
366 gradient of binding (Figure 5D-E). Furthermore, our qPCR analyses showed that only PDK1 among all

367 PH domain candidates was upregulated by HER2 levels, displaying a HER2-dose-dependent expression  
368 pattern (Figure S5B-C). Additionally, we demonstrated that the protein expression of PLC and p-PLC  
369 decreased upon HER2 upregulation or an increase in the cell density (Figure 5C and S4F). Based on  
370 these findings, we concluded that PIP2 is a shared substrate for both proliferation and migration  
371 pathways, and PDPK1 could potentially be the key regulator in the switch from proliferation to  
372 migration in high-HER2 expressing cells and high-density condition.

373 We then determined the optimal concentration of GSK 2334470 (a pharmacological inhibitor  
374 of PDPK1) that inhibited proliferation while keeping the cells alive (relative quantification compared to  
375 the starved medium control) (Figure S5E). Subsequently, SKBR3 cells were treated with 1uM GSK  
376 2334470 for 48 hours and then reseeded in low-density conditions under 1uM GSK 2334470 treatment,  
377 followed by an additional two-day incubation. We observed that PDPK1 inhibition could rescue  
378 perinuclear (NER) HER2 localization in SKBR3 as a high-HER2 expressing cells, which had not been  
379 observed previously (Figure 5F).

380 Subsequently, we proceeded to overexpress the PH domain of PDPK1, referred to as PH-  
381 PDPK1, in both the MCF10A-Teti-HER2\_GFP and MCF7 cell lines (Figure S5F). Intriguingly, the  
382 overexpression of PH-PDPK1 protein led to a significant reduction in the cellular localization of HER2  
383 in both MCF7 and MCF10A-Teti-HER2\_GFP cells under LD conditions. Notably, this overexpression of  
384 PH-PDPK1 resulted in promoting higher proliferation and reduced motility of cells (Figure 5G-J and  
385 S5G-I). However, it is worth noting that PH-PDPK1 overexpression did not elicit changes in the motility  
386 ability of MCF7 cells. This difference may be attributed to the smaller impact on the proliferation of  
387 MCF7 cells compared to MCF10A-Teti-HER2\_GFP cells and the distinct motility characteristics of the  
388 two cell types (Figure S5J). These results confirm the role of PDPK1 on the regulation of molecular  
389 switch at the membrane level.

390 Altogether, these results, along with the membrane HER2 localization results, elucidated the  
391 molecular switch mechanism from migration to proliferation and how cell-cell junctions and the  
392 activation of HER2 can concurrently regulate the migration of cancer cells (Figure 5K).

393

#### 394 **Patient sample analyses confirms various aspects of plasticity mechanism found *in vitro*:**

395 To investigate clinical relevance of our mechanistic findings, we conducted an analysis of the cellular  
396 positioning of HER2 in circulating tumor cells (CTCs) and clusters that had been identified using the  
397 Cellsearch system, based on Cytokeratin (CK5, 7, 8,18,19) and HER2 staining. We examined 429 cells  
398 and clusters obtained from M1 breast cancer patients with HER2+ status in their primary tumors  
399 (Figure S6A-C).

400 For single-cell analyses, we identified three distinct patterns of HER2 staining. Approximately  
401 half of the single cells exhibited spotty staining, which rationally cannot be considered as classical  
402 membrane HER2 staining. Our criteria for membrane staining required at least 50% membrane  
403 staining. Therefore, we focused our analyses on the remaining cells without the spotty staining  
404 pattern. Interestingly, we discovered that the majority of single CTCs with a non-spotty pattern  
405 exhibited cytoplasmic/non-membrane HER2 staining (38.75% non-membrane vs. 17.8% membrane  
406 staining). Remarkably, when analyzing cluster circulating cells, we observed that most of the clusters  
407 (89% membrane staining vs. 11% non-membrane staining) displayed a membrane staining pattern.  
408 More intriguingly, all the HER2 membrane staining was concentrated in the cell-cell contact surfaces  
409 (Figure 6 A and S6A), mirroring what we observed in our *in vitro* results (Figure 3A-C).

410 Further, we analyzed 14 primary tumor and metastasis samples from six M1 breast cancer  
411 patients with HER2-positive status in their primary tumors. We used imaging mass cytometry  
412 techniques to evaluate proliferation, migration, stemness, and desmosome junctions in solitary cancer  
413 cells separated from their epithelial compartments as compared to cluster compact epithelial  
414 structures. A pan cytokeratin staining (CK5, 7, 8,18,19) was employed as a detector of cancer cells, and  
415 a panel of antibodies was used to track our target phenotypes, including HER2 as the main candidate  
416 to track its cellular localization, KI67 as a proliferation marker, CDH1 (Ecad), VIM, and ZEB1 as EMT and  
417 migration markers, JUP (plakoglobin) as a desmosome junction marker, and ALDH1 as a stemness  
418 marker in HER2 breast cancer subtype.

419 Our results indicated that 88% of solitary HER2-positive cells exhibited non-  
420 membrane/cytoplasmic staining for HER2, which is nearly double the percentage of cytoplasmic  
421 staining (45%) in the cluster cells (Figure 6B and C). Interestingly, the number of KI67-positive cells was  
422 much lower in solitary single cells than in cluster cells. Conversely, the number of ZEB1-positive cells  
423 was significantly higher in solitary single cells compared to the cells in cluster structures (Figure 6D and  
424 E). Moreover, the intensity of the signal and percentages of high expressing cell lines for ALDH1 and  
425 plakoglobin was significantly higher in single cells compared to the clusters (Figure S6D and E).

426 Remarkably, when we assessed the correlation between HER2 cellular positioning and KI67  
427 and ZEB1 positivity, we found that solitary single cells with membrane HER2 staining were significantly  
428 less KI67-positive than cluster cells with membrane HER2 staining. Conversely, cytoplasmic HER2  
429 staining solitary cells were more ZEB1-positive compared to cytoplasmic HER2 staining cluster cells  
430 (Figure 6F). These findings may indicate the transition state of solitary cells from a proliferative  
431 phenotype to a migratory/mesenchymal state as they lose their cell contacts.

432 In summary, our study reveals a clinical manifestation of the plasticity mechanism we  
433 uncovered. Loss of cell contact upon dissemination prompts a shift in HER2 cellular localization,  
434 reflecting a transition from proliferation to migration, as observed in patient samples. These findings  
435 underscore the clinical relevance of our mechanistic insights into cancer cell behavior, shedding light  
436 on the phenotypic changes that occur during metastasis.

437

## 438 **Discussion:**

439 Our study presents significant findings that reshape our understanding of cancer cell plasticity in HER2-  
440 positive breast cancer. These findings introduce novel insights into HER2 subcellular localization,  
441 endoplasmic reticulum (ER) function, and the role of desmosome junctions in the regulation of cancer  
442 cell phenotypic switching between migration and proliferation.

443 Our research distinctly elucidates the subcellular localization of HER2. Specifically, we have  
444 demonstrated that, when HER2 is not membrane-bound, it accumulates within perinuclear ER  
445 organelles. This definitive clarification settles previous debates concerning the intracellular positioning  
446 of ERBB family proteins(33-39).

447 We also reveal a profound shift in ER function, transitioning from its established role in protein  
448 trafficking to a regulator of calcium flux via the PLC pathway. This transition in ER function is a critical  
449 determinant in modulating the HER2 oncogenic pathway, thereby influencing cancer cell phenotypic  
450 switching.

451 An essential aspect of our research focuses on the discovery of a molecular switch mechanism.  
452 We identify the pivotal role of desmosome junctions in facilitating early cell-cell contacts among cancer  
453 cells. In situations of cell junction loss or low cell density, an epithelial-to-mesenchymal transition  
454 (EMT) program is activated in epithelial cells, resulting in a significant upregulation of desmosome  
455 junctions. Remarkably, desmosome junctions endure as the last remaining epithelial cell contacts for  
456 disseminated cancer cells, exhibiting prolonged upregulation compared to other epithelial junctions.  
457 Furthermore, we establish a connection between the expression of cadherin genes (DSC1-3 and DSG1-  
458 3) and what we term "stickiness" in cancer cells. Our discovery of a physical binding between HER2 and  
459 DSP, serving as the core of desmosome junction assembly (40), highlights that elevated expression of  
460 these adhesive proteins enhances cancer cells' propensity to form junctions. This, in turn, facilitates  
461 HER2 localization and promotes proliferation. Our results provide mechanistic insights that elucidate  
462 recent findings in studies where DSC2 or plakoglobin expression in breast cancer cells conferred  
463 resistance to fluid shear stress and increased their ability to form clusters post-dissemination (41-43).  
464 Intriguingly, our Imaging Mass Cytometry (IMC) results corroborate this notion, illustrating a  
465 phenotypic switch in solitary single cancer cells with elevated plakoglobin, increased ZEB1, and  
466 reduced KI67 protein levels.

467 Another novel aspect of our study concerns the molecular switch occurring on the cell  
468 membrane when new cell contacts are established through desmosome junctions. Upon HER2  
469 localization to the membrane, a competition arises between the HER2 pathway and the PLC pathway  
470 for the occupation/using of PIP2 molecules. HER2 activation triggers the PI3K pathway, converting PIP2  
471 to PIP3. Simultaneously, HER2 activation upregulates PDPK1, which features a PH domain with a high  
472 binding affinity to PIP2. Consequently, HER2 activation consumes and occupies all available PIP2  
473 molecules, inhibiting PLC pathway activity and steering cells towards a proliferative state. This  
474 mechanistic revelation elucidates previous observations that overactivation of the HER2 pathway can  
475 transition cells from a migratory phenotype to a proliferative one (14).

476 Contrary to previous studies focusing on nuclear ERBB function, particularly interactions with  
477 STAT proteins and the JAK-STAT signaling pathway(44-46), our research presents findings that do not  
478 align with such localization. Nevertheless, a comprehensive analysis is warranted to fully comprehend  
479 the role of perinuclear HER2.

480 In summary, our study introduces a pioneering cancer cell plasticity mechanism governing the  
481 phenotypic switch between proliferation and migration in HER2-positive breast cancer. This  
482 mechanism assumes a pivotal role in the dissemination and colonization of cancer cells. Most notably,  
483 our findings offer fresh prospects for targeted therapies designed to eliminate cancer cells during their  
484 latent phase, prior to colonization.

485

486 **Methods and materials:** See supplementary Methods and materials.

487

488 **Acknowledgements:** This work was supported by grants from the DFG (HO 6175/4-1, SFB TRR305-A05  
489 and Deutsche Krebshilfe (70114988).

490

## 491 **References:**

- 492 1. A. Dasgupta, A. R. Lim, C. M. Ghajar, Circulating and disseminated tumor cells: harbingers or  
493 initiators of metastasis? *Molecular oncology* **11**, 40-61 (2017).

- 494 2. C. A. Klein, Parallel progression of primary tumours and metastases. *Nature reviews. Cancer*  
495 **9**, 302-312 (2009).
- 496 3. H. Hosseini *et al.*, Early dissemination seeds metastasis in breast cancer. *Nature*, (2016).
- 497 4. K. L. Harper *et al.*, Mechanism of early dissemination and metastasis in HER2(+) mammary  
498 cancer. *Nature*, (2016).
- 499 5. C. L. Chaffer, B. P. San Juan, E. Lim, R. A. Weinberg, EMT, cell plasticity and metastasis. *Cancer*  
500 *metastasis reviews* **35**, 645-654 (2016).
- 501 6. H. Jayatilaka *et al.*, Tumor cell density regulates matrix metalloproteinases for enhanced  
502 migration. *Oncotarget* **9**, 32556-32569 (2018).
- 503 7. G. M. Sharif *et al.*, Cell growth density modulates cancer cell vascular invasion via Hippo  
504 pathway activity and CXCR2 signaling. *Oncogene* **34**, 5879-5889 (2015).
- 505 8. Y. Fan, T. Meyer, Molecular control of cell density-mediated exit to quiescence. *Cell reports*  
506 **36**, 109436 (2021).
- 507 9. J. W. O'Connor, K. Mistry, D. Detweiler, C. Wang, E. W. Gomez, Cell-cell contact and matrix  
508 adhesion promote  $\alpha$ SMA expression during TGF $\beta$ 1-induced epithelial-myofibroblast  
509 transition via Notch and MRTF-A. *Sci Rep* **6**, 26226 (2016).
- 510 10. Y.-H. Chen *et al.*, Loss of cell-cell adhesion triggers cell migration through Rac1-dependent  
511 ROS generation. *Life Science Alliance* **6**, e202201529 (2023).
- 512 11. M. A. Cichon, C. M. Nelson, D. C. Radisky, Regulation of epithelial-mesenchymal transition in  
513 breast cancer cells by cell contact and adhesion. *Cancer informatics* **14**, 1-13 (2015).
- 514 12. J. Ursini-Siegel, B. Schade, R. D. Cardiff, W. J. Muller, Insights from transgenic mouse models  
515 of ERBB2-induced breast cancer. *Nature reviews. Cancer* **7**, 389-397 (2007).
- 516 13. H. Liu *et al.*, MYC suppresses cancer metastasis by direct transcriptional silencing of  $\alpha$ v $\beta$ 3  
517 and  $\beta$ 3 integrin subunits. *Nature cell biology* **14**, 567-574 (2012).
- 518 14. J. N. Hutchinson, J. Jin, R. D. Cardiff, J. R. Woodgett, W. J. Muller, Activation of Akt-1 (PKB-  
519  $\alpha$ ) can accelerate ErbB-2-mediated mammary tumorigenesis but suppresses tumor  
520 invasion. *Cancer research* **64**, 3171-3178 (2004).
- 521 15. O. J. Sansom *et al.*, Loss of Apc allows phenotypic manifestation of the transforming  
522 properties of an endogenous K-ras oncogene *in vivo*. *Proc Natl Acad Sci U S A* **103**, 14122-  
523 14127 (2006).
- 524 16. A. Q. Kohrman, D. Q. Matus, Divide or Conquer: Cell Cycle Regulation of Invasive Behavior.  
525 *Trends in cell biology* **27**, 12-25 (2017).
- 526 17. A. Patel, N. Unni, Y. Peng, The Changing Paradigm for the Treatment of HER2-Positive Breast  
527 Cancer. *Cancers* **12**, (2020).
- 528 18. D. E. Carvajal-Hausdorf *et al.*, Measurement of Domain-Specific HER2 (ERBB2) Expression  
529 May Classify Benefit From Trastuzumab in Breast Cancer. *Journal of the National Cancer*  
530 *Institute* **107**, (2015).
- 531 19. D. Grassini *et al.*, Unusual Patterns of HER2 Expression in Breast Cancer: Insights and  
532 Perspectives. *Pathobiology : journal of immunopathology, molecular and cellular biology* **89**,  
533 278-296 (2022).
- 534 20. H. S. Won *et al.*, Clinical significance of HER2-low expression in early breast cancer: a  
535 nationwide study from the Korean Breast Cancer Society. *Breast Cancer Research* **24**, 22  
536 (2022).
- 537 21. D. Y. Oh *et al.*, HER2 as a novel therapeutic target for cervical cancer. *Oncotarget* **6**, 36219-  
538 36230 (2015).
- 539 22. L. F. Abrahao-Machado, C. Scapulatempo-Neto, HER2 testing in gastric cancer: An update.  
540 *World journal of gastroenterology* **22**, 4619-4625 (2016).
- 541 23. M. J. M. Magbanua *et al.*, Genomic and expression profiling reveal molecular heterogeneity  
542 of disseminated tumor cells in bone marrow of early breast cancer. *npj Breast Cancer* **4**, 31  
543 (2018).
- 544 24. C. Lopes *et al.*, HER2 Expression in Circulating Tumour Cells Isolated from Metastatic Breast  
545 Cancer Patients Using a Size-Based Microfluidic Device. *Cancers* **13**, (2021).



- 546 25. B. Rack *et al.*, Comparison of HER2 Expression in Primary Tumor and Disseminated Tumor  
547 Cells in the Bone Marrow of Breast Cancer Patients. *Oncology* **90**, 232-238 (2016).
- 548 26. B. A. S. Jaeger *et al.*, The HER2 phenotype of circulating tumor cells in HER2-positive early  
549 breast cancer: A translational research project of a prospective randomized phase III trial.  
550 *PLoS one* **12**, e0173593 (2017).
- 551 27. F. C. Tsai, G. H. Kuo, S. W. Chang, P. J. Tsai, Ca<sup>2+</sup> signaling in cytoskeletal reorganization, cell  
552 migration, and cancer metastasis. *BioMed research international* **2015**, 409245 (2015).
- 553 28. E. M. Wenzel, L. A. Elfmark, H. Stenmark, C. Raiborg, ER as master regulator of membrane  
554 trafficking and organelle function. *The Journal of cell biology* **221**, (2022).
- 555 29. A. S. Hammad, K. Machaca, Store Operated Calcium Entry in Cell Migration and Cancer  
556 Metastasis. *Cells* **10**, (2021).
- 557 30. K. Hayashi, T. S. Yamamoto, N. Ueno, Intracellular calcium signal at the leading edge  
558 regulates mesodermal sheet migration during *Xenopus* gastrulation. *Scientific Reports* **8**,  
559 2433 (2018).
- 560 31. W. S. Park *et al.*, Comprehensive identification of PIP3-regulated PH domains from *C. elegans*  
561 to *H. sapiens* by model prediction and live imaging. *Molecular cell* **30**, 381-392 (2008).
- 562 32. M. P. Scheid, M. Parsons, J. R. Woodgett, Phosphoinositide-dependent phosphorylation of  
563 PDK1 regulates nuclear translocation. *Molecular and cellular biology* **25**, 2347-2363 (2005).
- 564 33. L. K. Johnson, I. Vlodyavsky, J. D. Baxter, D. Gospodarowicz, Nuclear accumulation of  
565 epidermal growth factor in cultured rat pituitary cells. *Nature* **287**, 340-343 (1980).
- 566 34. C. Y. Ni, M. P. Murphy, T. E. Golde, G. Carpenter, gamma -Secretase cleavage and nuclear  
567 localization of ErbB-4 receptor tyrosine kinase. *Science (New York, N.Y.)* **294**, 2179-2181  
568 (2001).
- 569 35. M. Offterdinger, C. Schöfer, K. Weipoltshammer, T. W. Grunt, c-erbB-3: a nuclear protein in  
570 mammary epithelial cells. *The Journal of cell biology* **157**, 929-939 (2002).
- 571 36. S. C. Wang *et al.*, Binding at and transactivation of the COX-2 promoter by nuclear tyrosine  
572 kinase receptor ErbB-2. *Cancer cell* **6**, 251-261 (2004).
- 573 37. K. Dittmann *et al.*, Radiation-induced epidermal growth factor receptor nuclear import is  
574 linked to activation of DNA-dependent protein kinase. *The Journal of biological chemistry*  
575 **280**, 31182-31189 (2005).
- 576 38. F. D. Cuello-Carrión *et al.*, HER2 and  $\beta$ -catenin protein location: importance in the prognosis  
577 of breast cancer patients and their correlation when breast cancer cells suffer stressful  
578 situations. *Clinical & experimental metastasis* **32**, 151-168 (2015).
- 579 39. L. Ma *et al.*, JWA down-regulates HER2 expression via c-Cbl and induces lapatinib resistance  
580 in human gastric cancer cells. *Oncotarget; Vol 7, No 44*, (2016).
- 581 40. O. Nekrasova, K. J. Green, Desmosome assembly and dynamics. *Trends in cell biology* **23**,  
582 537-546 (2013).
- 583 41. K. Li, R. Wu, M. Zhou, H. Tong, K. Q. Luo, Desmosomal proteins of DSC2 and PKP1 promote  
584 cancer cells survival and metastasis by increasing cluster formation in circulatory system.  
585 *Science Advances* **7**, eabg7265 (2021).
- 586 42. F. Reimer *et al.*, The role of the desmosomal protein desmocollin 2 in tumour progression in  
587 triple negative breast cancer patients. *Cancer Cell International* **23**, 47 (2023).
- 588 43. N. Aceto *et al.*, Circulating Tumor Cell Clusters Are Oligoclonal Precursors of Breast Cancer  
589 Metastasis. *Cell* **158**, 1110-1122 (2014).
- 590 44. R. I. Cordo Russo *et al.*, Targeting ErbB-2 nuclear localization and function inhibits breast  
591 cancer growth and overcomes trastuzumab resistance. *Oncogene* **34**, 3413-3428 (2015).
- 592 45. R. I. Cordo Russo, M. F. Chervo, S. Madera, E. H. Charreau, P. V. Elizalde, Nuclear ErbB-2: a  
593 Novel Therapeutic Target in ErbB-2-Positive Breast Cancer? *Hormones & cancer* **10**, 64-70  
594 (2019).
- 595 46. C. C. Williams *et al.*, The ERBB4/HER4 receptor tyrosine kinase regulates gene expression by  
596 functioning as a STAT5A nuclear chaperone. *The Journal of cell biology* **167**, (2004).

597



598

## Main Figures

### 599Figure 1:

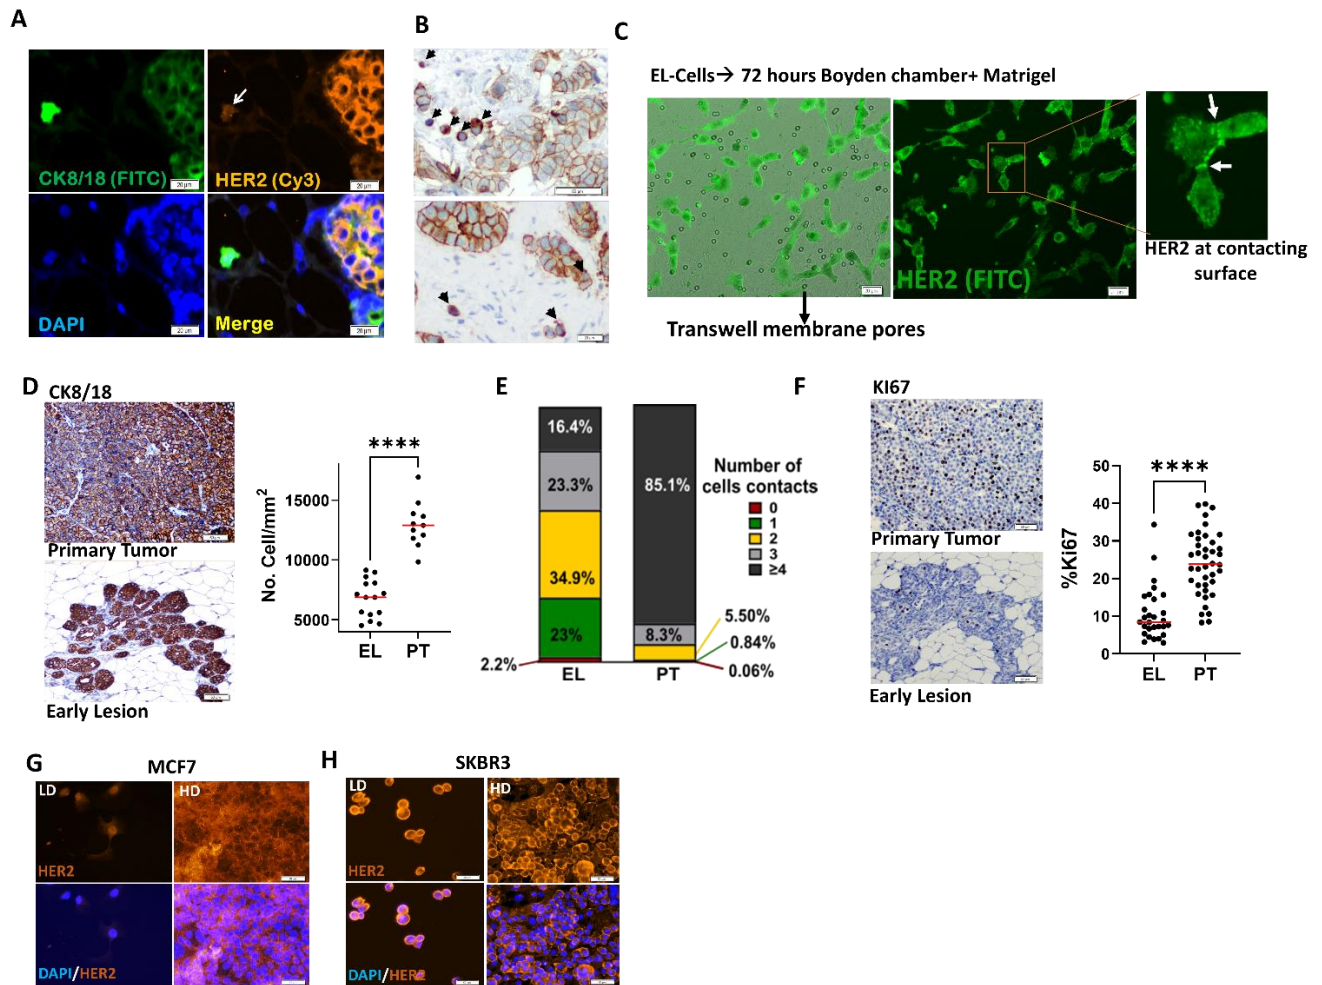

600

601 **Figure 1: Cell-cell contact, cellular density, and HER2 expression levels are intricately linked to the membrane**  
 602 **localization of HER2 and the phenotypic switch in breast cancer cells. A)** Non-membrane HER2 localization in  
 603 solitary cancer cells within primary lesions from the BALB-neuT mouse model. HER2 is labeled with Cy3, and  
 604 CK8/18 with FITC. **B)** HER2 staining in HER2+ human breast primary tumor (PT) samples with HER2 IHC scores +1,  
 605 +2, and +3, highlighting solitary cancer cells (indicated by arrows) exhibiting distinct HER2 cellular localization  
 606 compared to cells within the tumor mass. **C)** *In vitro* invasion assay for cancer cells isolated from EL lesions of  
 607 BALB-NeuT, revealing migrating cells on the opposite side of the Boyden chamber's membrane, lacking HER2  
 608 staining on the cell membrane (as seen in the FITC channel), with HER2 exclusively localized at the cell-cell contact  
 609 surface (indicated by arrows). Boyden chambers were coated with 40% Matrigel, and 50,000 cells per 24-well  
 610 insert were cultured for 72 hours, with FCS-free medium above and FCS-containing medium below the chamber.  
 611 **D)** Confirmation of tight epithelial structures in PT compared to EL lesions in BALB-neuT samples through  
 612 cytokeratin (CK8/18) staining. **E)** Quantification showing reduced cell contacts in cells within EL structures  
 613 compared to those within PT structures of BALB-NeuT, presented as a percentage graph obtained by counting  
 614 cell contacts from five CK8/18 staining images per case. **F)** Increased frequency of Ki67+ cells in PT tight structures  
 615 compared to EL in BALB-neuT samples, indicating higher proliferation levels. **G-H)** Cellular localization of HER2 in  
 616 low and high-HER2 expressing cell lines at varying cell culture densities. In cell lines with low to moderate HER2  
 617 expression, such as MCF7 (G), HER2 localizes to the cytoplasmic-nuclear compartment at low cell density (500  
 618 cells/cm<sup>2</sup>; 72-hour culture) but shifts to membrane localization at high cell density (20,000 cells/cm<sup>2</sup>; 72-hour  
 619 culture). Conversely, in SKBR3 cells, a HER2+ cell line with strong HER2 expression, HER2 remains consistently

620 localized to the membrane regardless of cell density. See also Extended Data Fig. S1C and S1E-G. All p-values  
 621 calculated using Student t-test; data in panels D and F are presented as means.

622 **Figure 2:**

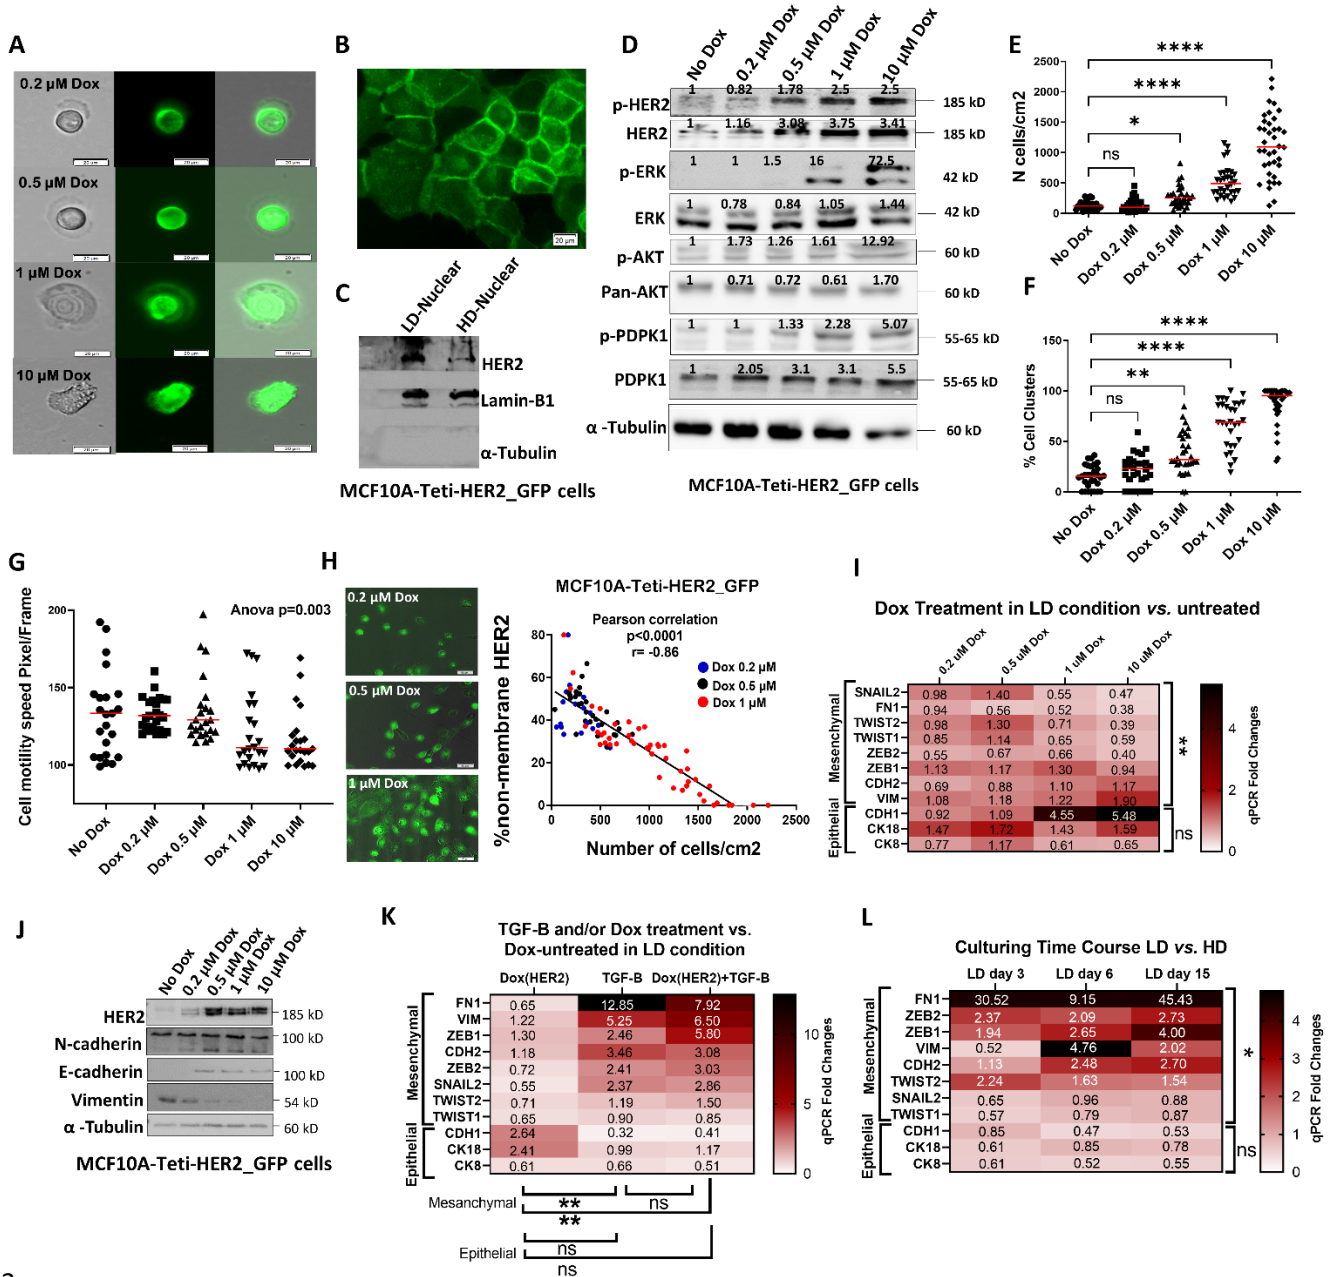

623

624 **Figure 2: *In vitro* modeling of HER2 expression levels and cell density regulation of HER2 cellular localization**  
 625 **and phenotypic cell transitions. A-B)** HER2 cellular localization in low density (LD) and high density (HD)  
 626 conditions in MCF10-Teti-HER2\_GFP cells. Low to moderate expression of HER2 (Dox 100nM to 1  $\mu\text{M}$ ) resulted  
 627 in similar LD images with non-membrane HER2\_GFP, whereas high expression of HER2 (Dox 10  $\mu\text{M}$ ) led to  
 628 membrane bound HER2 (A). In HD conditions, HER2 was consistently located on the cell membrane regardless of  
 629 HER2 expression levels (B). **C)** Immunoblotting for the nuclear fraction of MCF10A-Teti-HER2\_GFP cells in LD and  
 630 HD. Lamin B1 served as the loading control for the nuclear fraction, and  $\alpha$ -Tubulin as the loading control for the  
 631 cytoplasmic fraction. The absence of Tubulin in the nuclear fraction indicates the absence of cytoplasmic  
 632 contamination in the nuclear fraction. **D)** Protein expression levels of p-ERK, p-PDPK1, and p-AKT increase upon  
 633 HER2 activation, confirming that HER2 expression can enhance cell proliferation. **E-F)** Inducing HER2 expression  
 634 levels increases cell proliferation, leading to higher cell density (E) and the formation of more cell clusters (F) (G)

635 Increasing HER2 expression levels reduces the migration ability of MCF10A-Teti-HER2\_GFP cells, as indicated by  
636 cell motility per frame. Cells were cultured in low density (LD) conditions (2000 cells/cm<sup>2</sup>) for 24 hours before  
637 image acquisition, and cell monitoring and image acquisition were conducted every 10 minutes over 24 hours.  
638 **H)** Induction of HER2 expression levels enhances cell proliferation, subsequently leading to higher cell density  
639 and a reduction in non-membrane HER2. Cells were cultured for 72 hours in LD conditions (2000 cells/cm<sup>2</sup>) and  
640 treated with varying concentrations of Dox. The X-axis represents the final cell counts at the time of image  
641 acquisition. **I)** qPCR results depict the expression levels of epithelial-mesenchymal transition (EMT) markers in  
642 MCF10A-Teti-HER2\_GFP cells cultured for 72 hours in LD conditions (2000 cells/cm<sup>2</sup>) and treated with different  
643 Dox concentrations (0.2-1  $\mu$ M) compared to untreated cells. **J)** Immunoblotting results of MCF10A-Teti-  
644 HER2\_GFP cells cultured for 72 hours in LD conditions (2000 cells/cm<sup>2</sup>) and treated with various Dox  
645 concentrations, demonstrating that HER2 expression also modulates EMT markers at the protein level. Increasing  
646 HER2 expression induces E-cadherin expression and reduces Vimentin protein levels. **K)** qPCR results of EMT  
647 markers in MCF10A-Teti-HER2\_GFP cells cultured for 72 hours in LD conditions (2000 cells/cm<sup>2</sup>) and treated with  
648 TGF-B (5 ng/ml daily) with or without Dox (1  $\mu$ M). Notably, HER2 expression alone could not reverse the  
649 mesenchymal phenotype. **L)** Prolonged culturing of cells in LD conditions intensifies the induction of the  
650 mesenchymal state in MCF10A-Teti-HER2\_GFP cells. P-values in panels G and I were calculated using a two-way  
651 ANOVA test. P-values in panel L were calculated using student paired t-test between days 3 and 15. P-values in  
652 panels E and F were calculated using the Mann-Whitney U test. The p-value in panel H is presented from the  
653 Pearson correlation test. Data in panels E, F, and G are represented as medians.

654

655

656

657

658

659

660

661

662

663

664

665

666

667

668

669

670

671

672

673

674

675 **Figure 3:**

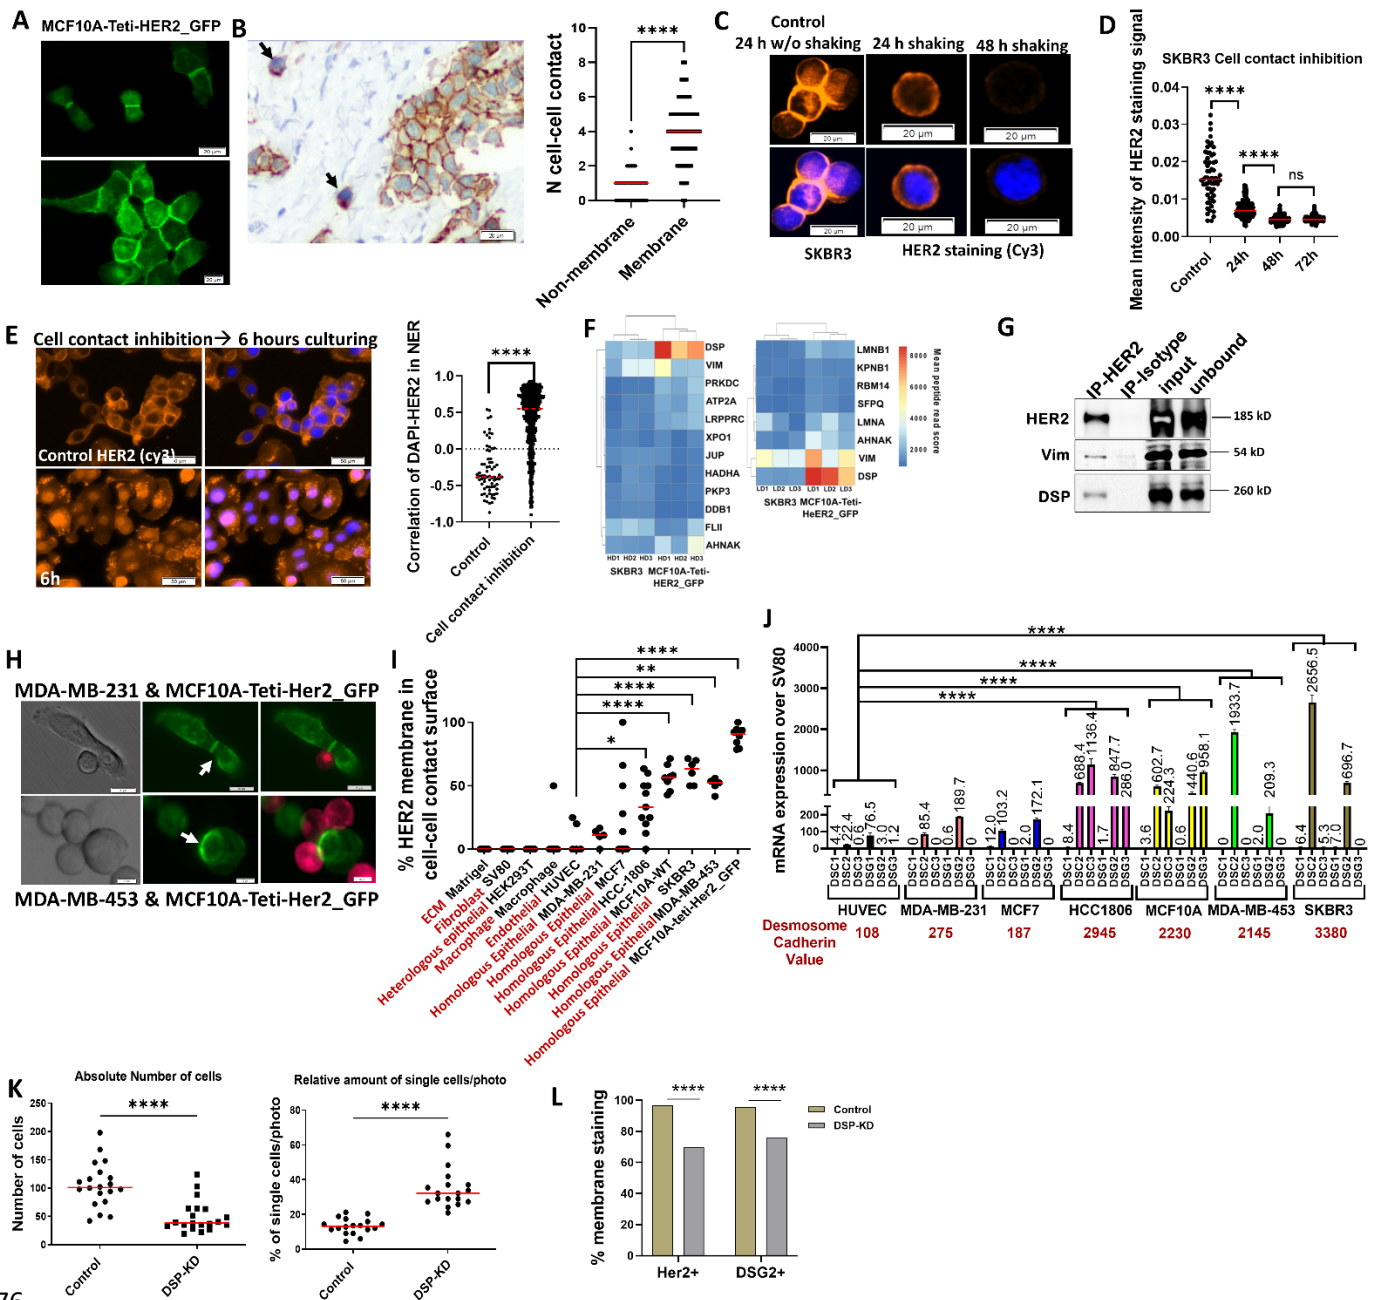

676

677 **Figure 3: Desmosome Junctions Initiate HER2 Membrane Localization in Early Cell-Cell Contacts.** **A)** Cell-cell  
 678 contact is essential for HER2 membrane localization and stabilization. HER2 is expressed on the cell membrane  
 679 when two cells make contact. **B)** HER2 staining in a primary breast tumor (HER2 IHC scores 1+, 2+, 3+). Arrows  
 680 indicate solitary cancer cells separated from the tumor mass structure with different HER2 cellular localization  
 681 compared to the cells in the tumor mass. The right graph quantifies HER2 non-membrane localization and the  
 682 number of cell contacts. An increase in the number of cell-cell contacts (an indicator of cell density) leads to  
 683 increased membrane HER2 localization. **C)** SKBR3 cells cultured in non-adherent conditions and shaken for 48  
 684 hours to inhibit cell contact. HER2 disappeared from the membrane after 48 hours of shaking. **D)** Quantification  
 685 of the intensity signal of HER2 staining in Shaking-SKBR3 cells after 24, 48, and 72 hours. **E)** HER2 staining (Cy3)  
 686 in SKBR3 cells, seeded after 48 hours of shaking in LD condition and fixed after 6 hours. Quantification shows the  
 687 correlation between HER2 staining signal (Cy3) and DAPI in the nuclear and endoplasmic reticulum area (NER).  
 688 **F)** Mass spectrometric analysis identified desmosome junction components, particularly Desmoplakin (DSP) and  
 689 Vimentin (VIM), as consistent binding partners of HER2 across LD and HD conditions in MCF10A-teti-HER2\_GFP



690 cells and shaking-SKBR3 cells. **G)** The physical binding of HER2 to Vim and DSP was further confirmed by co-  
 691 immunoprecipitation in MCF10A-Teti-HER2-GFP cells treated with 1  $\mu$ M Dox. **H-I)** Co-culture of MCF10A-teti-  
 692 HER2\_GFP cells with different cell types and tracking cell-cell contact and HER2 membrane localization. MCF10A-  
 693 teti-HER2\_GFP cells were cultured in LD condition for 24 hours and then co-cultured (in the same well as mixed  
 694 culture) for an additional 24 hours with different cell types and extracellular matrix (ECM) conditions. Certain  
 695 epithelial cell lines such as SKBR3 and MDA-MB453 could restore HER2 to the membrane, while others (such as  
 696 HEK293T and SV80) did not exhibit this ability. The quantification represents the percentage of cell contacts  
 697 overlapping with HER2 membrane localization in MCF10A-teti-HER2\_GFP cells. **J)** mRNA expression of  
 698 desmosome adhesion surface cadherin proteins, which show higher cadherin expression values for cells that can  
 699 facilitate HER2 membrane localization in the co-cultures with MCF10A-teti-HER2\_GFP. **K)** Upon siRNA  
 700 knockdown of DSP in MCF10A-Teti-HER2-GFP cells, the total number of cells decreased in the KD group compared  
 701 to the control (Scramble). This reduction in the number of cells appears to be due to a decreased cell junction  
 702 ability in the DSP-KD group, as demonstrated in the right graph by increasing number of single cells in DSP-KD  
 703 group. **L)** The intensity of HER2 and DSG2 decreased on the cell contact surface of cells upon the knockdown of  
 704 DSP. Cells were fixed and stained for DSG2, 6 hours after culturing in the LD condition. P-values in panels B, D, E,  
 705 and I were calculated using the Mann-Whitney U test, and data are presented as medians. P-values in panel K  
 706 were calculated by the Student t-test, and data are presented as means  $\pm$  SD. P-values in panel J were calculated  
 707 using a One-way ANOVA test. P-values in panel L were calculated by the chi-square test.

708

709 **Figure 4:**

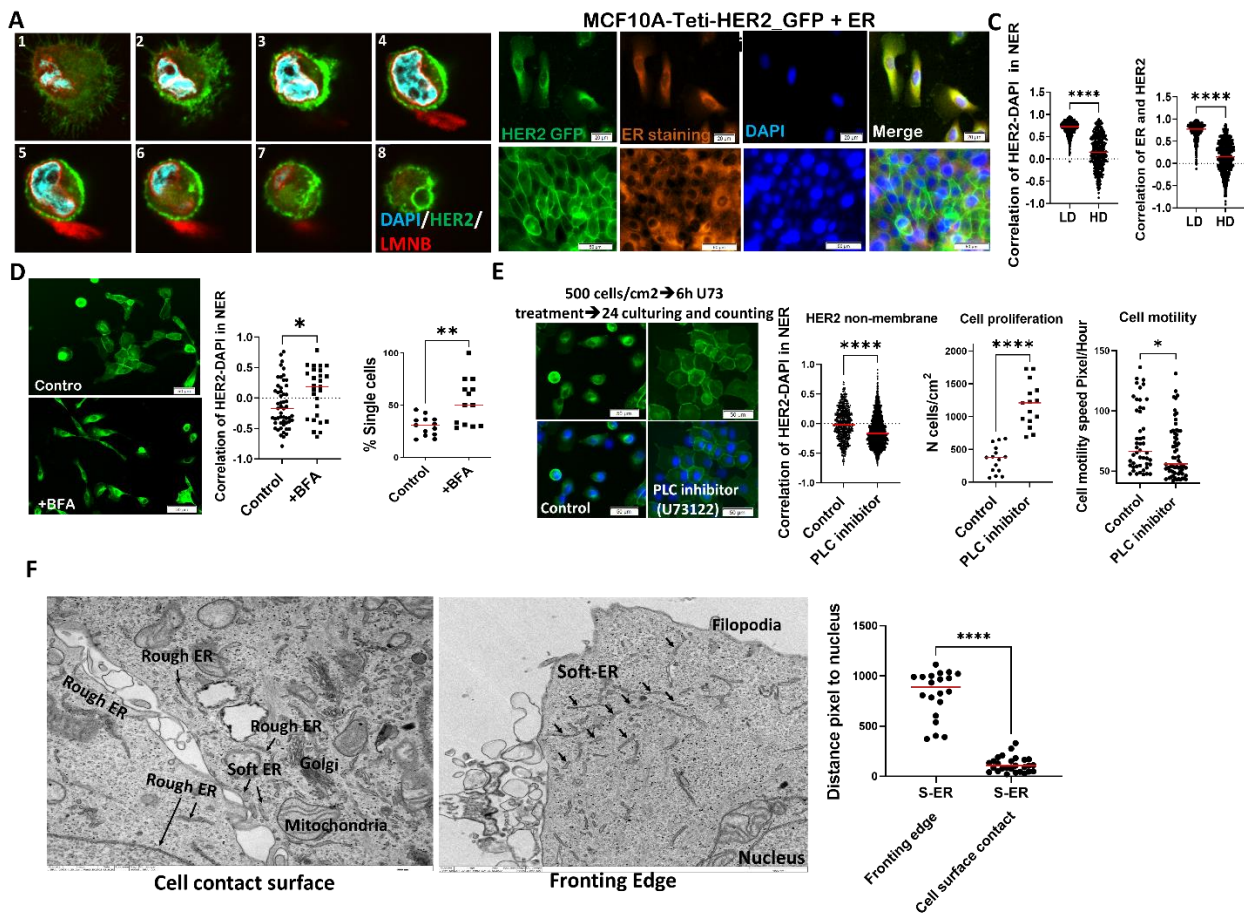

710

711 **Figure 4: HER2 Accumulation in the Endoplasmic Reticulum (ER) due to a Shift in ER Function from Protein**  
 712 **Trafficking to the Regulation of Cell Migration.** **A)** Confocal imaging revealed the precise cellular localization of  
 713 HER2. HER2 (FITC staining) was localized not within the nucleus (DAPI staining) but in close proximity to the  
 714 nucleus. Notably, the nuclear envelope, comprised of a double membrane bilayer originating from the ER

715 membrane (indicated by LaminB1 staining in the Cy3 channel), forms the most evident boundary around the  
716 nucleus. **B)** A strong correlation between HER2 and ER was observed in low cellular density; however, this  
717 correlation is not seen in high density (HD). **C)** Quantification of HER2-DAPI in NER (nuclear and ER; right panel)  
718 and HER2 and ER in figure B. **D)** Inhibition of (anterograde) protein trafficking by BFA (50 µg/ml) increases the  
719 nuclear/ER localization of HER2 in MCF10A-teti-HER2\_GFP cells, treated with 1 µM Dox and cultured in medium  
720 density (10000 cells/cm<sup>2</sup>). Quantification shows the increase in the NER and HER2 correlation upon BFA  
721 treatment and an increase in the number of single cells. **E)** Inhibition of ER function during cell migration by  
722 pharmacological inhibition of PLC. The MCF10A-teti-HER2\_GFP cells, cultured in LD, were treated with 1 µM of  
723 PLC inhibitor for only 6 hours and then subsequently cultured for 24 hours. This treatment increases membrane  
724 HER2 localization (right quantification panel), increase cell proliferation (middle quantification panel; cell  
725 counting results), and decreases cell motility (left quantification panel). **F)** Transmission electron microscopy  
726 (TEM) imaging in MCF7 cells showed soft-ER moving alongside the leading edge of migrating cells and staying  
727 close to the nucleus in cells in compact structures, indicating changes in the organization of the S-ER upon  
728 changes in cell density. Arrows indicate different compartments of the cells in both conditions. All p-values were  
729 calculated using the Mann-Whitney U test, and data are presented as medians.

730

731

732

733

734

735

736

737

738

739

740

741

742

743

744

745

746

747

748



749 **Figure 5:**

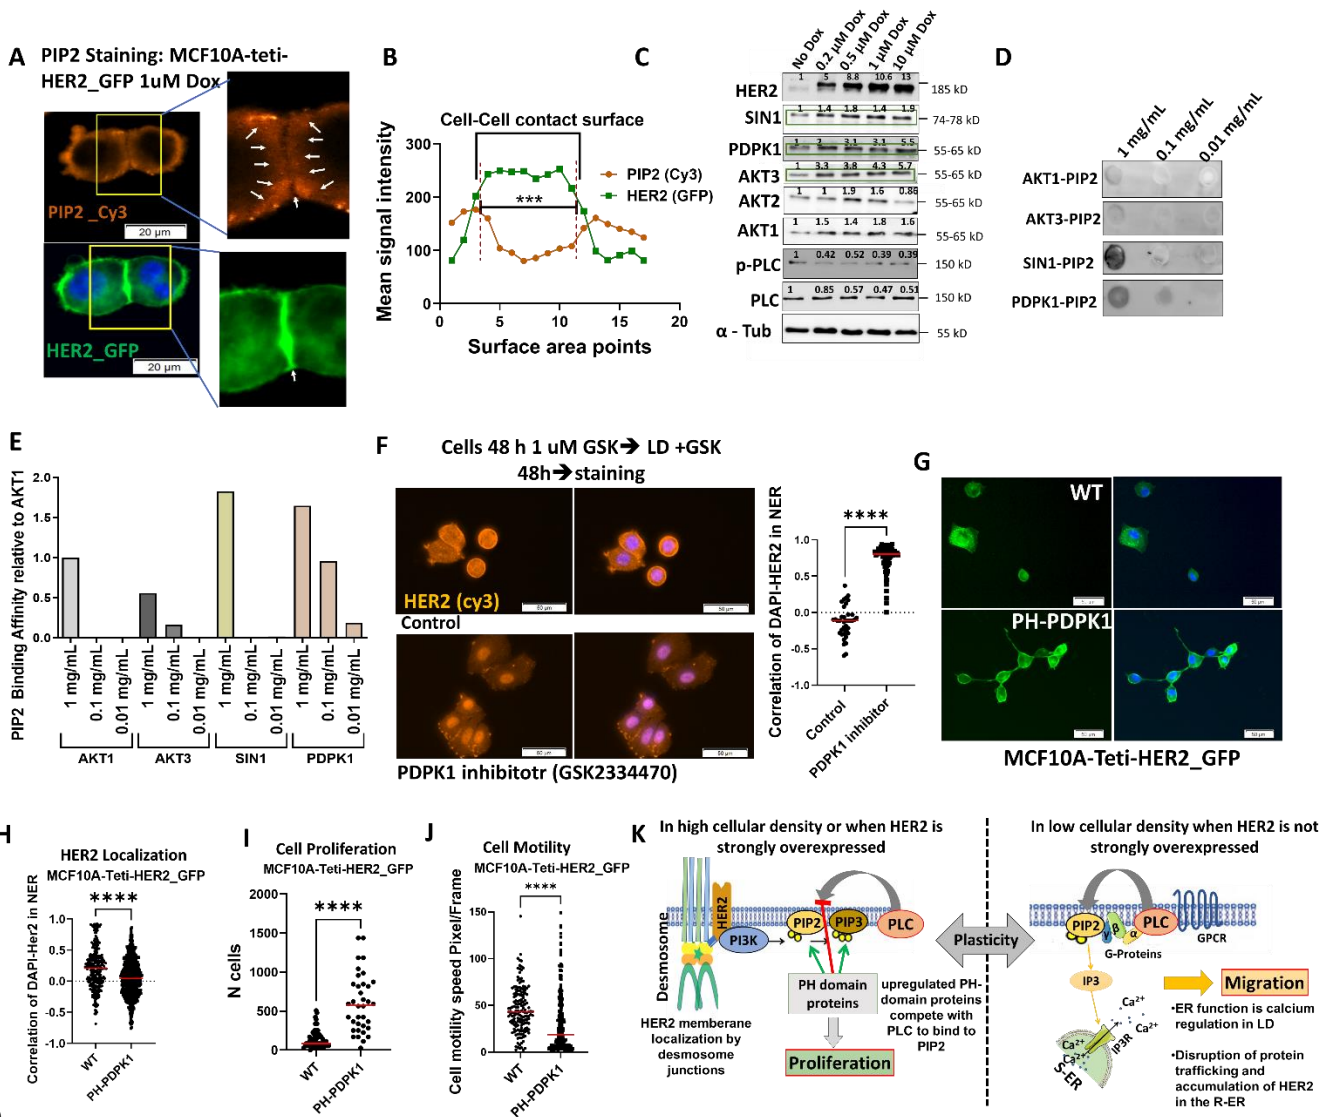

750  
 751 **Figure 5: Molecular Switch: A Competition Between PLC and PDPK1 Defines Migration or Proliferation**  
 752 **Phenotypes. A)** PIP2 (Cy3) staining in MCF10A-teti-HER2\_GFP cells treated with 1 μM Dox reveals a depletion of  
 753 PIP2 at the cell-cell contact surface where HER2 localizes to the membrane. **B)** Quantification of PIP2 staining  
 754 and HER2\_GFP presented in Figure 5A. Intensity of Cy3 staining signal or GFP has been quantified across different  
 755 areas of cell membrane. Results per each point show mean signal measured in 10 cells. **C)** AKT1, AKT3, PDPK1,  
 756 and Sin1 PH domain proteins show co-upregulation in protein levels due to HER2 upregulation in MCF10A-teti-  
 757 HER2\_GFP cells treated with different concentrations of Dox. **D)** Protein lipid overlay (PLO) assay demonstrates  
 758 that Sin1 and PDPK1 can bind to PIP2 at the highest concentration, with PDPK1 displaying a gradient of binding  
 759 to varying PIP2 concentrations. **E)** Quantification of the PLO assay presented in Figure 5D. **F)** Pharmacological  
 760 inhibition of PDPK1 rescues HER2 (Cy3) cellular localization in SKBR3 cells. **G-J)** Overexpression of the PH-domain  
 761 of PDPK1 in MCF10A-teti-HER2\_GFP cells cultured in LD reduces non-membrane HER2 (G, quantification in H),  
 762 increases cell proliferation (I), and decreases proliferation (J). **K)** A molecular switch regulating cancer cell  
 763 plasticity. Left: Upon cell-cell contact, HER2 localizes and stabilizes on the cell membrane by physically binding  
 764 to desmosome proteins, thereby activating proliferation pathways through upregulation of the PH-domain-  
 765 containing protein PDPK1. Activation of PI3K utilizes PIP2 to generate PIP3, and the upregulation of PDPK1 can  
 766 also bind to PIP2, inhibiting the PLC pathway. Right: In LD, PLC can bind to PIP2, converting it to DAG and IP3. IP3  
 767 then binds to its receptor, IP3R, on the ER membrane, releasing Ca<sup>2+</sup> and inducing migration pathways. All p-  
 768 values are calculated using the Mann-Whitney U test, and data are presented by median.

769 **Figure 6:**

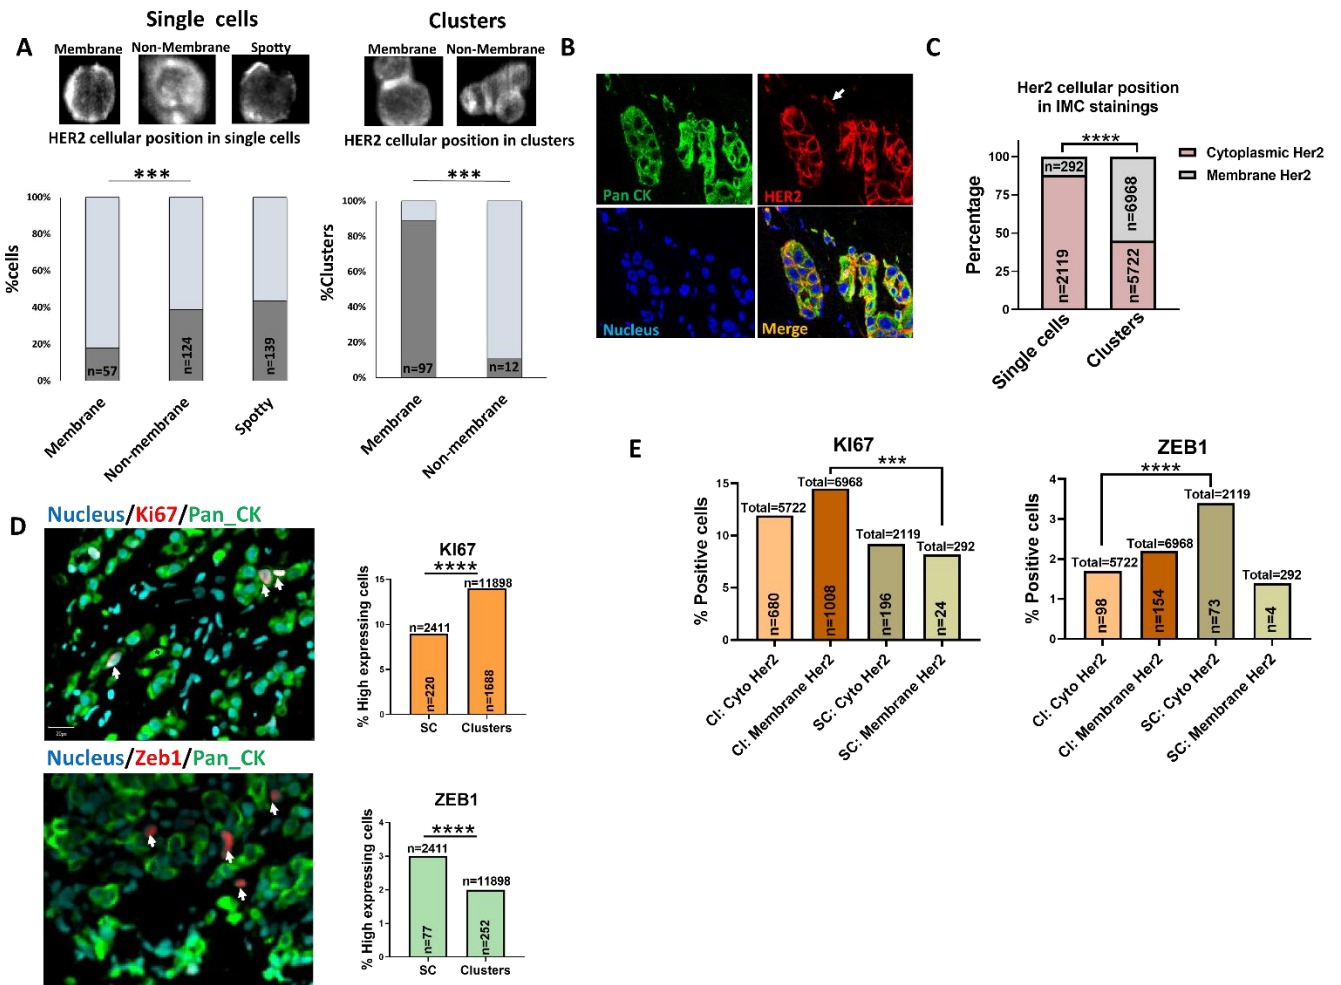

770

771 **Figure 6: Clinical Relevance: Disseminated Cancer Cells in Breast Cancer Reduce Membrane HER2 and**  
 772 **Transition from Proliferation to Migration Phenotype. A)** Analysis of 429 circulating tumor cells (CTCs) and  
 773 clusters obtained from 32 M1 (metastasis positive) HER2+ breast cancer patients using a cell search device to  
 774 determine the cellular position status of HER2. Various examples of HER2 staining patterns are shown above the  
 775 panel, with quantification presented below. Results indicate a higher prevalence of non-membrane HER2 staining  
 776 in CTCs. In all HER2-positive clusters (89% of all clusters), HER2 staining is confined to the cell-cell contact surface  
 777 of the cells. **B)** Results of imaging mass cytometer (IMC) staining for HER2 in 14 PT and metastasis human breast  
 778 cancer samples. The arrow indicates non-membrane HER2 staining in solitary cells. **C)** Quantification of HER2  
 779 staining, distinguishing between membrane and cytoplasmic (non-membrane) staining of HER2. **D)** IMC staining  
 780 examples for KI67 and ZEB1. On the right, quantification of KI67 and ZEB1 staining is presented, indicating a  
 781 higher proliferation rate (KI67) in cluster cells and a more mesenchymal state (ZEB1) in single cells. **E)** Analyzing  
 782 single cells and cluster cells to assess the HER2 cellular location in KI67 and ZEB1 positive cells. The number of  
 783 KI67-positive cells with membrane HER2 staining is significantly higher in clusters compared to single cells (left  
 784 panel). The number of ZEB1-positive cells with cytoplasmic HER2 staining is significantly higher in single cells  
 785 compared to clusters (right panel). All p-values were calculated using chi-square test.

786

787

788

789

790

## Supplementary Figures

### 791 Supplementary Figure 1:

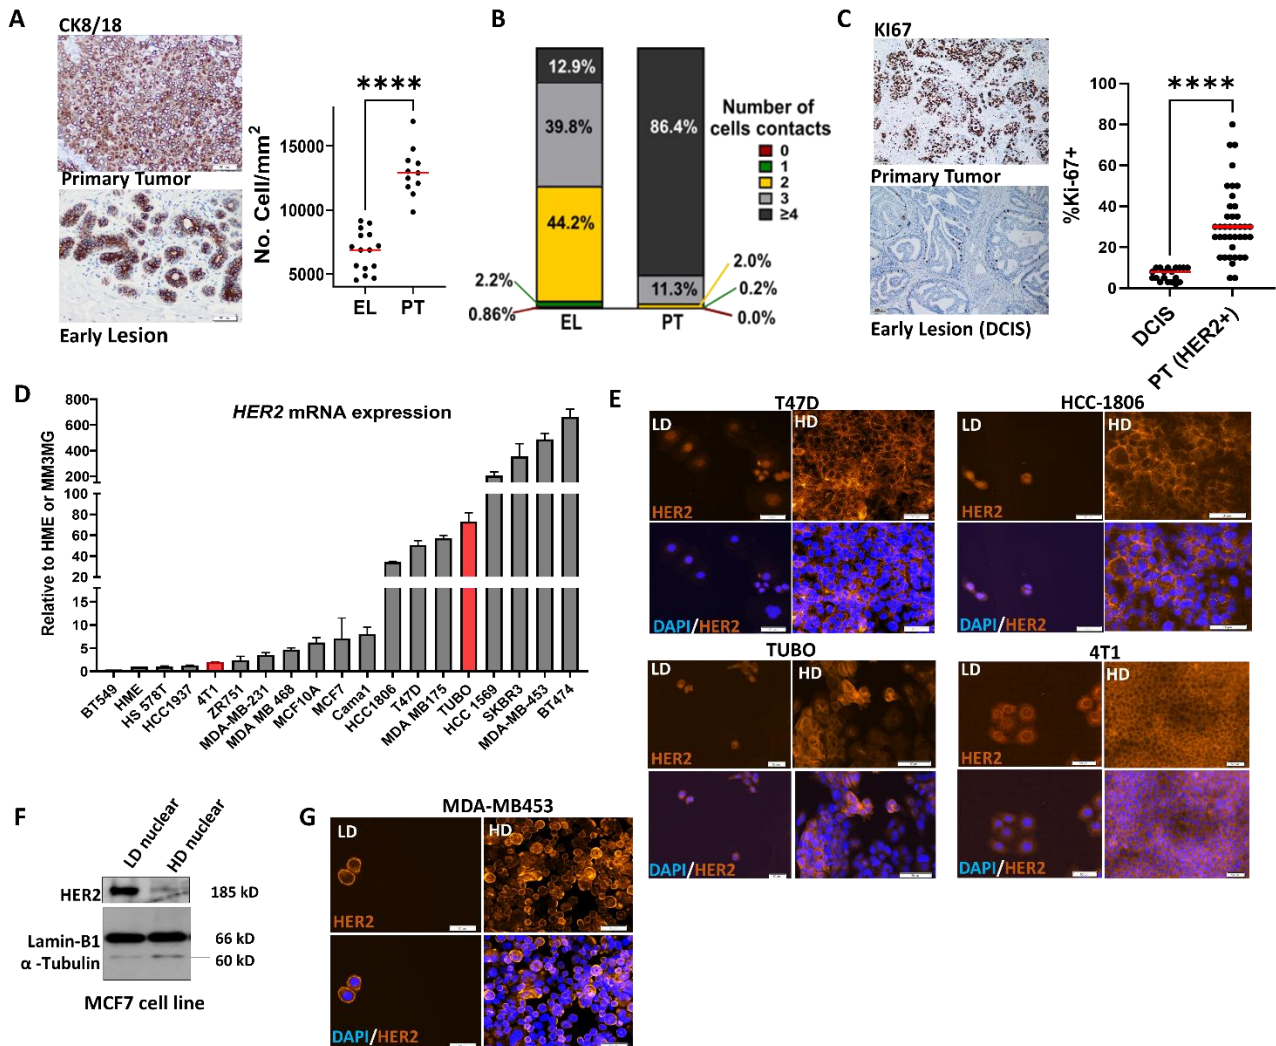

792

793 **Supplementary Data Figure 1: Cell-cell contact and HER2 expression levels, and cellular density are linked to**  
 794 **the membrane localization of HER2. A)** Confirmation of tight epithelial structures in primary tumor (PT)  
 795 compared to early lesion (EL) sections from human PT breast cancer samples, demonstrated through cytokeratin  
 796 (CK8/18) staining. **B)** Quantification revealing a reduction in cell contacts within cells located in EL structures in  
 797 contrast to those within PT structures of human PT breast cancer samples, presented as a percentage graph  
 798 derived from counting cell contacts in five CK8/18 staining images per case. **C)** Elevated frequency of Ki67+  
 799 cells in PT's tight structures compared to EL in human breast cancer samples, indicative of higher proliferation levels.  
 800 **D)** Relative mRNA expression levels of HER2 in various human breast cancer cell lines, in comparison to the  
 801 hTERT-HME cell line (gray columns), and a murine breast cancer cell line, relative to the MM3MG murine  
 802 mammary epithelial cell line (red columns). **E)** In cell lines with low to moderate HER2 expression, such as T47D  
 803 and HCC-1806 (human cell lines), as well as TUBO and 4T1 (murine cell lines), HER2 localizes to the cytoplasmic-  
 804 nuclear compartment at low cellular density (500 cells/cm<sup>2</sup>) but shifts to membrane localization at high cellular  
 805 density (20,000 cells/cm<sup>2</sup>). **F)** Immunoblotting for the nuclear fraction of MCF7 cells in low density (LD) and high  
 806 density (HD). Lamin B1 served as the loading control for the nuclear fraction, and α-Tubulin as the loading control  
 807 for the cytoplasmic fraction. The absence of α-Tubulin in the nuclear fraction indicates the absence of  
 808 cytoplasmic contamination in the nuclear fraction. **G)** In MDA-MB453 cells, a HER2+ cell line with strong HER2  
 809 expression, HER2 remains consistently localized in the membrane, irrespective of cell density. All p-values were



810 calculated using Student t-test; data in panels A and C are presented as means, and in panel D presented as  
 811 means ± SD.

812

813 **Supplementary Figure 2:**

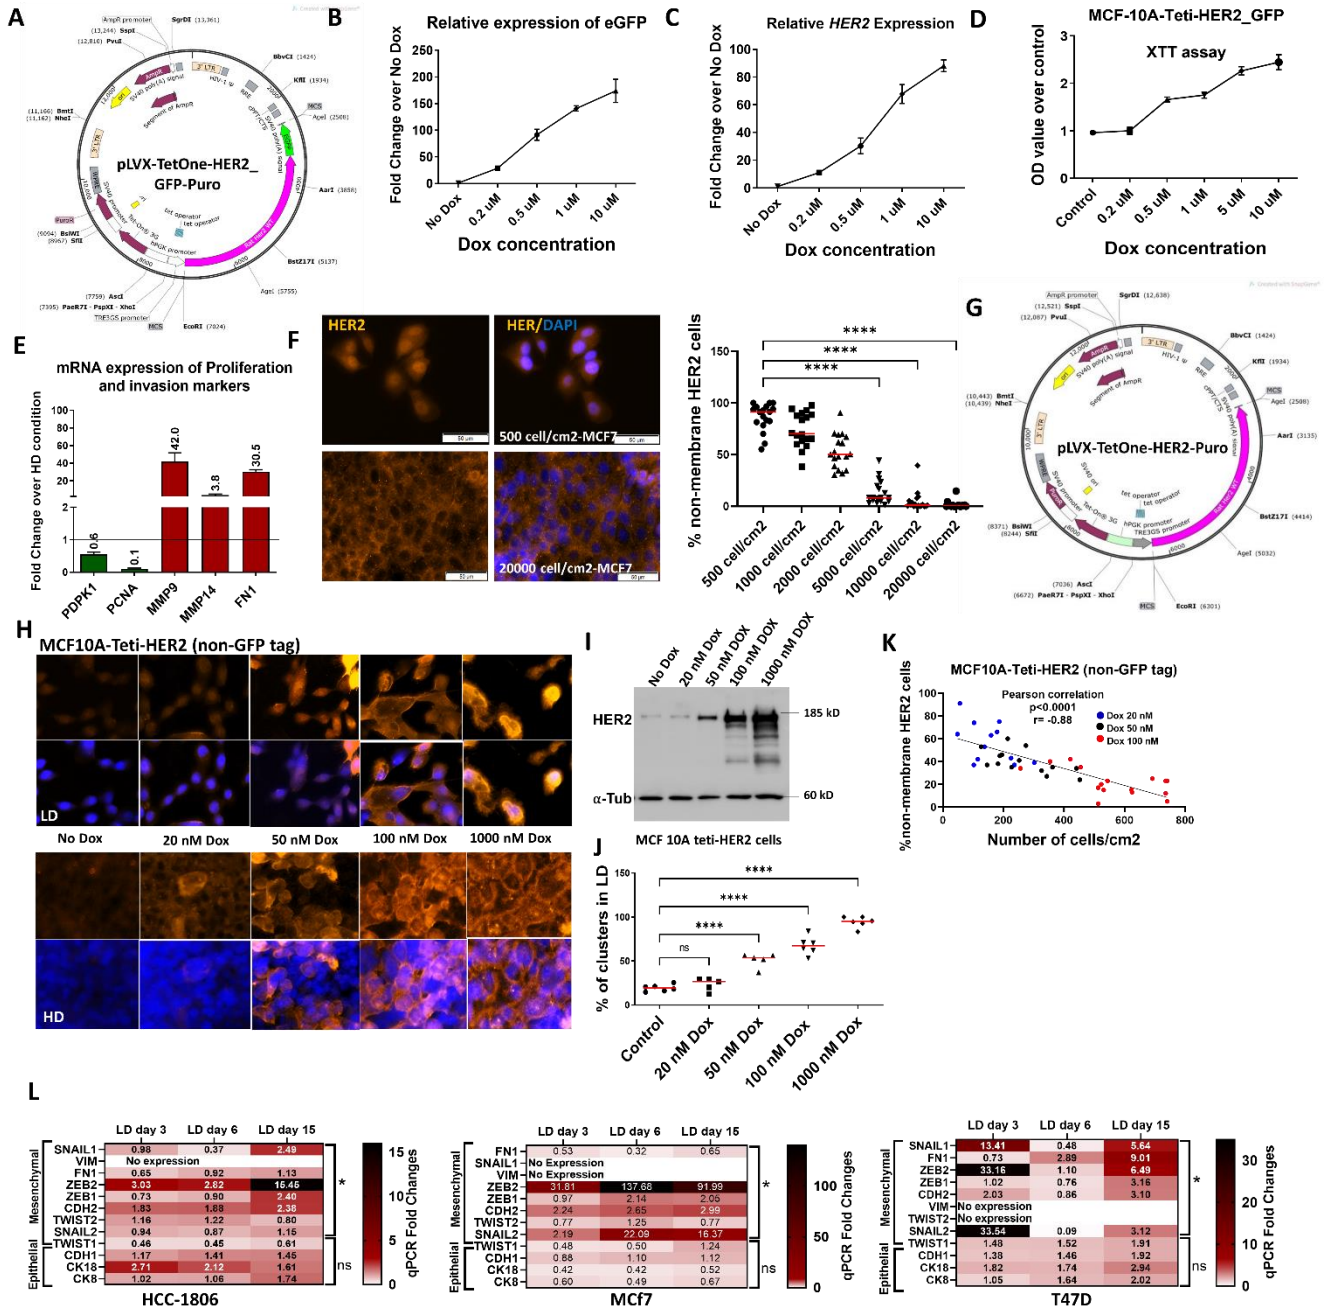

814

815 **Supplementary Data Figure 2: HER2 Expression Level and Cell Density Regulation of HER2 Cellular Localization**  
 816 **and Phenotypic State of Cells.** **A)** A Tet-On HER2 inducible model in MCF10A cells. Addition of Dox induces HER2  
 817 expression, which can be tracked by GFP. **B-C)** The relative mRNA expression of eGFP (**B**) and HER2 (**C**) increases  
 818 upon HER2 activation. In this model, administration of Doxycycline (Dox) induces HER2 expression that can be  
 819 tracked by GFP. **D)** Inducing HER2 expression can increase cell proliferation in MCF10A-teti-HER2\_GFP cells, as  
 820 shown by the XTT assay measurement after 72 hours of treatment with different concentrations of Dox. **E)**  
 821 Phenotypic switch in MCF10A-teti-HER2\_GFP cells. mRNA expression levels of migration and proliferation  
 822 markers at constant HER2 expression (1 μM Dox) under different densities cultured for 72 hours showed a

823 downregulation of Ki67 and PCNA (proliferation markers) expression but elevated MMP9, MMP14, and FN1  
 824 (invasion markers) levels in low-density (LD). **F**) In MCF7 cells cultured for 72 hours, increased cell density resulted  
 825 in an increase in HER2 membrane localization. **G**) Map of the vector of a non-GFP-tagged MCF10A-Teti-HER2  
 826 model. **H-K**) This model in (G) was used to rule out the possible influence of the eGFP tag on HER2 function. The  
 827 MCF10A-teti-HER2 cells were treated with different concentrations of Dox and stained for HER2 (Cy3) in LD and  
 828 HD. Cells showed non-membrane HER2 localization in LD and membrane HER2 localization in HD, and upon Dox  
 829 induction, the number of cells increased, while the percentage of non-membrane HER2 cells decreased. The non-  
 830 GFP tag model is more Dox-sensitive compared to the GFP-tag model (J). Dox induction also resulted in more  
 831 cluster formation in cells cultured in LD. **L**) Prolonged culturing of human breast cancer cells in LD conditions  
 832 intensifies the induction of the mesenchymal state. The exception is T47D, which shows a reduction of  
 833 mesenchymal genes on day 6; however, it significantly upregulates them on day 15. P-values in panel L were  
 834 calculated using student paired t-test between day 15 and 3 days for HCC-1806 and MCF7 and between day 15  
 835 and 6 in T47D. P-values in panels F and I were calculated using the Mann-Whitney U test. The p-value in panel K  
 836 is presented from the Pearson correlation test. Data in panels F and J are represented as medians, and data in  
 837 panel E are represented as means  $\pm$  SD.

838

839 **Supplementary Figure 3:**

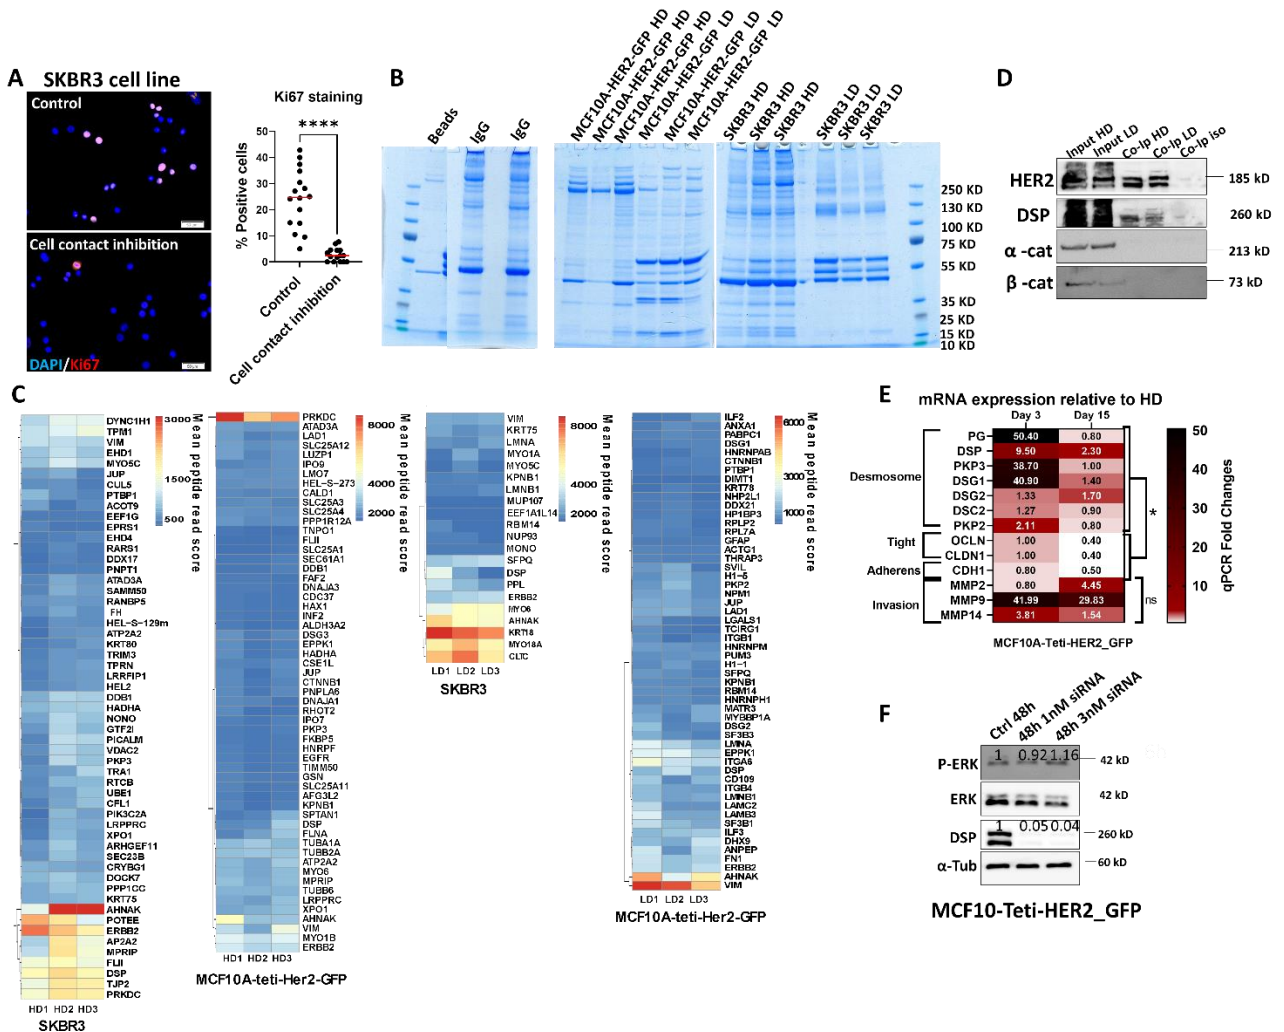

840

841 **Supplementary Data Figure 3: Desmosome Junctions Initiate HER2 Membrane Localization in Early Cell-Cell**  
 842 **Contacts.** **A)** The frequency of Ki67+ cells were reduced in shaking-SKBR3 cells, confirming that the cytoplasmic  
 843 localization of HER2 in SKBR3 cells reduced their proliferation ability. **B)** Image of the SDS-gel for mass  
 844 spectrometry. **C)** Results of HER2 binding partners from protein mass spectrometry analysis for two cell lines and

845 LD and HD conditions. **D**) Co-immunoprecipitation of  $\alpha$ -catenin and  $\beta$ -catenin with HER2. These two proteins do  
 846 not physically bind to HER2. **E**) qPCR analysis of desmosome junctions in MCF10A-teti-HER2\_GFP cells, treated  
 847 with 1 $\mu$ M Dox and cultured in LD for 3 and 15 days. Desmosome junctions, compared with tight and adherent  
 848 junctions, were upregulated after 3 days of being cultured in LD conditions and were the most stable cell  
 849 junctions, gradually losing their expression profile during long-term culturing (15 days). **F**) Immunoblotting results  
 850 of proliferation markers such as p-ERK in MCF10A-teti-HER2\_GFP cells with DSP-KD showed that the knockdown  
 851 had no effect on cell proliferation in HD. P-value in panel A calculated using the Mann-Whitney U test, and data  
 852 presented as medians. P-values in panel E were calculated by the student t-test, and comparison applied for day  
 853 15 only.

## 854 Supplementary Figure 4:

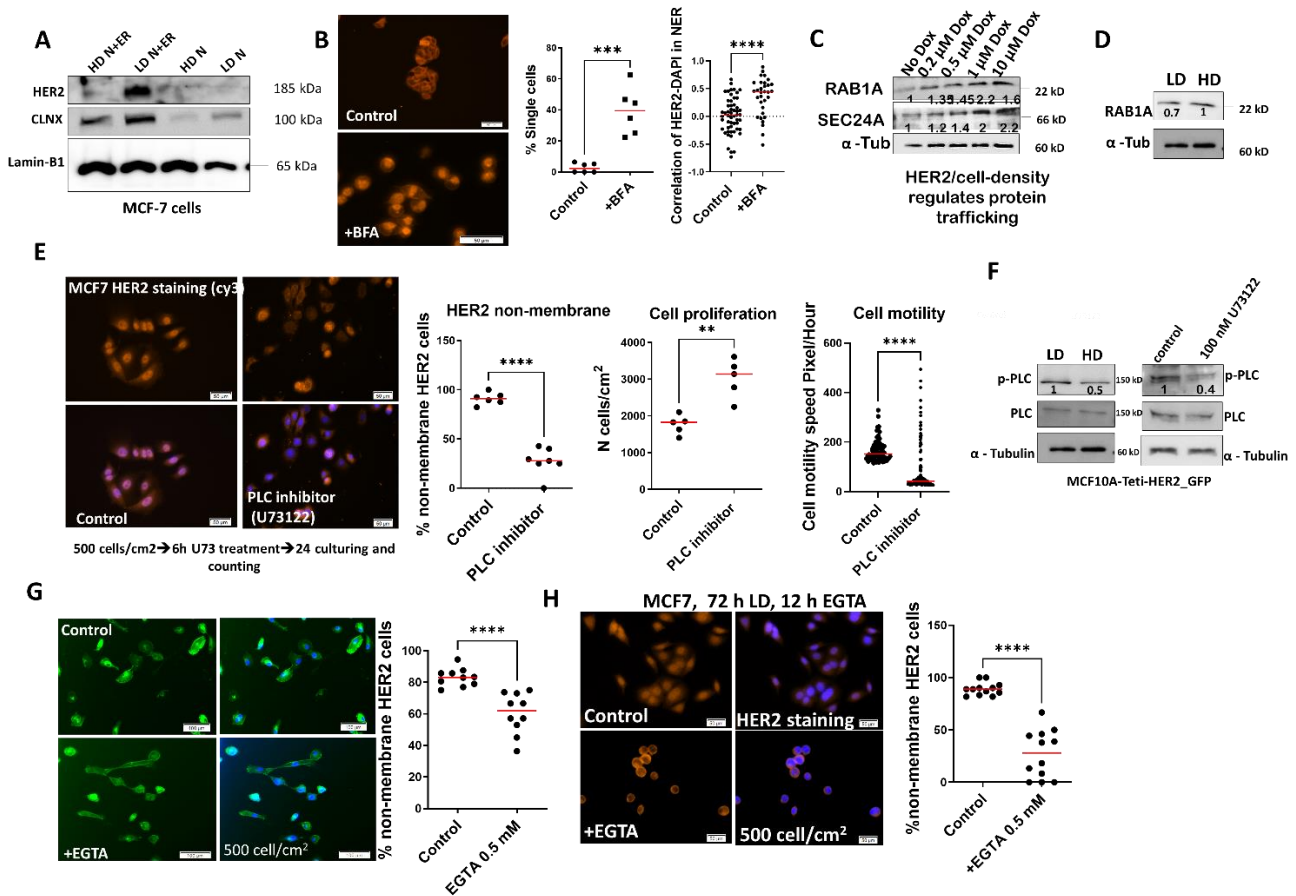

855

856 **Supplementary Data Figure 4: HER2 Accumulation in the Endoplasmic Reticulum (ER) due to a Shift in ER**  
 857 **Function from Protein Trafficking to the Regulation of Cell Migration.** **A**) Immunoblotting of cell organelle  
 858 fractionation in MCF7 cells. Also, refer to the methods section. The nuclear/cytoplasmic accumulation of HER2  
 859 (NER) correlates with the fraction enriched in calnexin (CLNX) protein, a typical marker for the ER organelle. **B**)  
 860 Inhibition of (anterograde) protein trafficking by BFA (50  $\mu$ g/ml) increases the nuclear/ER localization of HER2 in  
 861 MCF7 cells cultured at medium density (5000 cells/cm<sup>2</sup>). Quantification shows the increase in the NER and HER2  
 862 correlation upon BFA treatment and an increase in the number of single cells. **C**) HER2 expression and cell density  
 863 are the decisive factors for protein trafficking in cells. RAB1A and SEC24A, as two protein trafficking markers, are  
 864 upregulated with an increase in HER2 expression and cell density in MCF10A-teti-HER2\_GFP cells. **D**) The protein  
 865 expression of RAB1A, a protein trafficking marker, is higher in HD than in LD in MCF10A-teti-HER2\_GFP cells. **E**)  
 866 MCF7 cells treated with 1  $\mu$ M of PLC inhibitor for only 6 hours and subsequently cultured for 24 hours. This  
 867 treatment increases membrane HER2 localization (right quantification panel), increase cell proliferation (middle  
 868 quantification panel; cell counting results), and decreases cell motility (left quantification panel). **F**)  
 869 Immunoblotting of PLC and p-PLC expression in LD is much higher than in HD in MCF10A-teti-HER2\_GFP cells.  
 870 Immunoblotting confirms PLC downregulation upon the addition of 100nM PLC inhibition (U73122). **G**) Calcium



871 withdrawal in MCF10A-teti-HER2\_GFP cells, treated with 1uM Dox and 0.5mM EGTA. The treatment resulted in  
 872 a lower percentage of non-membrane HER2 cells. **H)** Calcium withdrawal in MCF7 cells, treated with 1uM Dox  
 873 and 0.5mM EGTA. The treatment led to a lower percentage of non-membrane HER2 cells. All p-values were  
 874 calculated by the Student t-test, and data are presented as means.

875

876 **Supplementary Figure 5:**

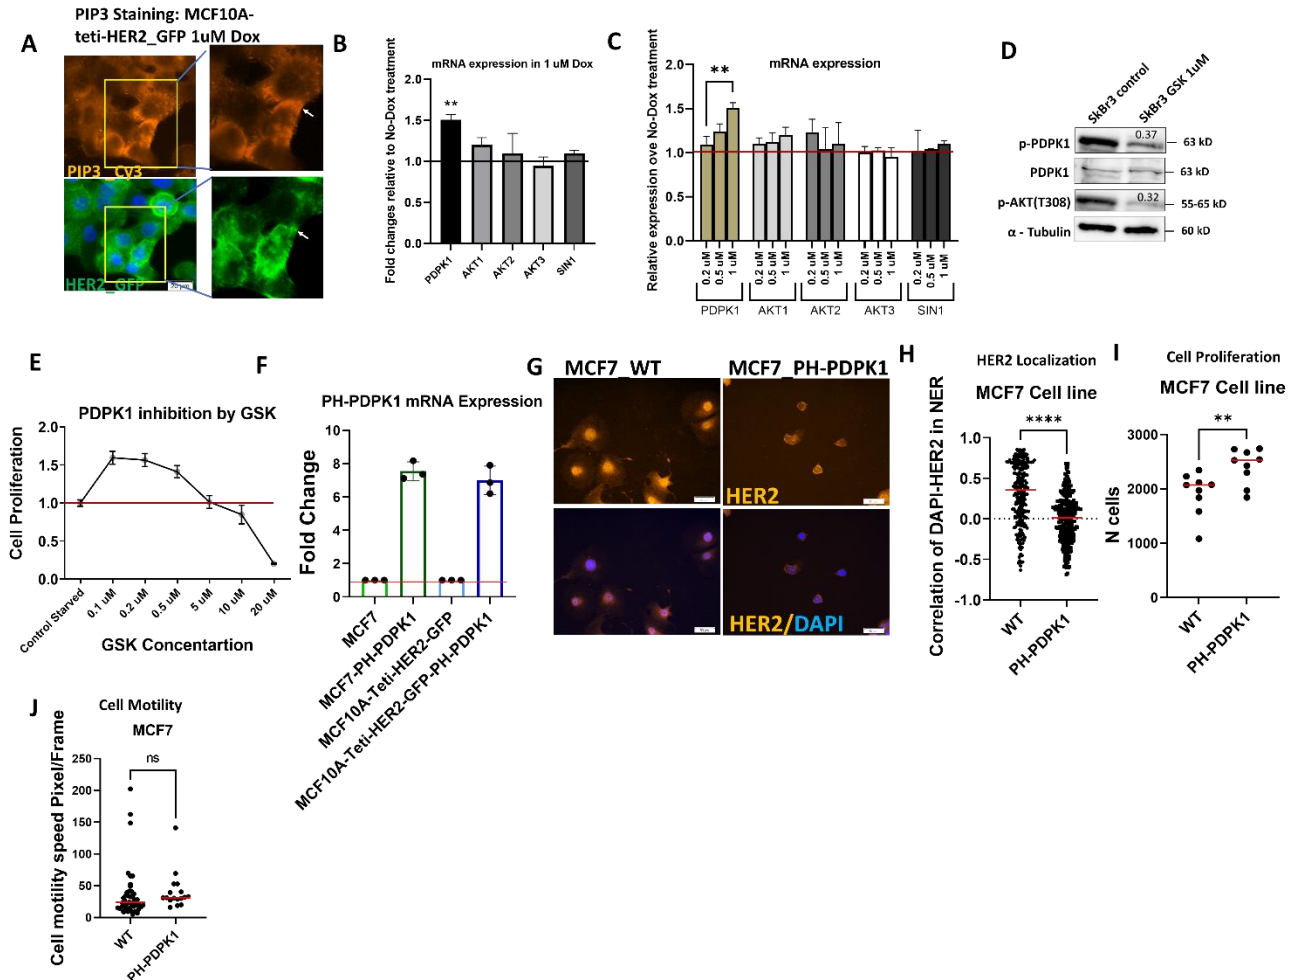

877

878 **Supplementary Data Figure 5: Competition Between PLC and PDPK1 Defines Migration or Proliferation**  
 879 **Phenotypes. A)** PIP3 staining (Cy3) exhibits a strong correlation with HER2 at the cell-cell contact surface. **B-C)**  
 880 qPCR analyses of genes encoding PH-domain containing proteins revealed that among all PH domain candidates,  
 881 only PDPK1 was upregulated by HER2 levels in MCF10A-teti-HER2\_GFP cells, displaying a HER2-dose-dependent  
 882 expression pattern. **D)** Immunoblotting confirms PDPK1 downregulation upon treatment with the PDPK1  
 883 inhibitor (1uM) and its downstream target (p-AKT). **E)** Determination of the optimal concentration of the PDPK1  
 884 inhibitor, which inhibits proliferation while keeping the cells viable (relative quantification compared to the  
 885 starved medium control). **F)** mRNA expression quantification of PH-PDPK1 overexpression. **G-J)** HER2 staining  
 886 (Cy3) in MCF7 cells with overexpression of the PH-domain of PDPK1 (PH-PDPK1). PH-PDPK1 overexpression  
 887 rescued membrane HER2 localization in LD (**G** and **H**) and increased cell proliferation (**I**). However, the impact of  
 888 PH-PDPK1 overexpression on the cell motility trait of MCF7 cells was not detected, unlike what was observed for  
 889 MCF10A-teti-HER2\_GFP in Figure 5J (**J**). All p-values calculated using a student t-test, and data are presented by  
 890 means.

891

892

893 **Supplementary Figure 6:**

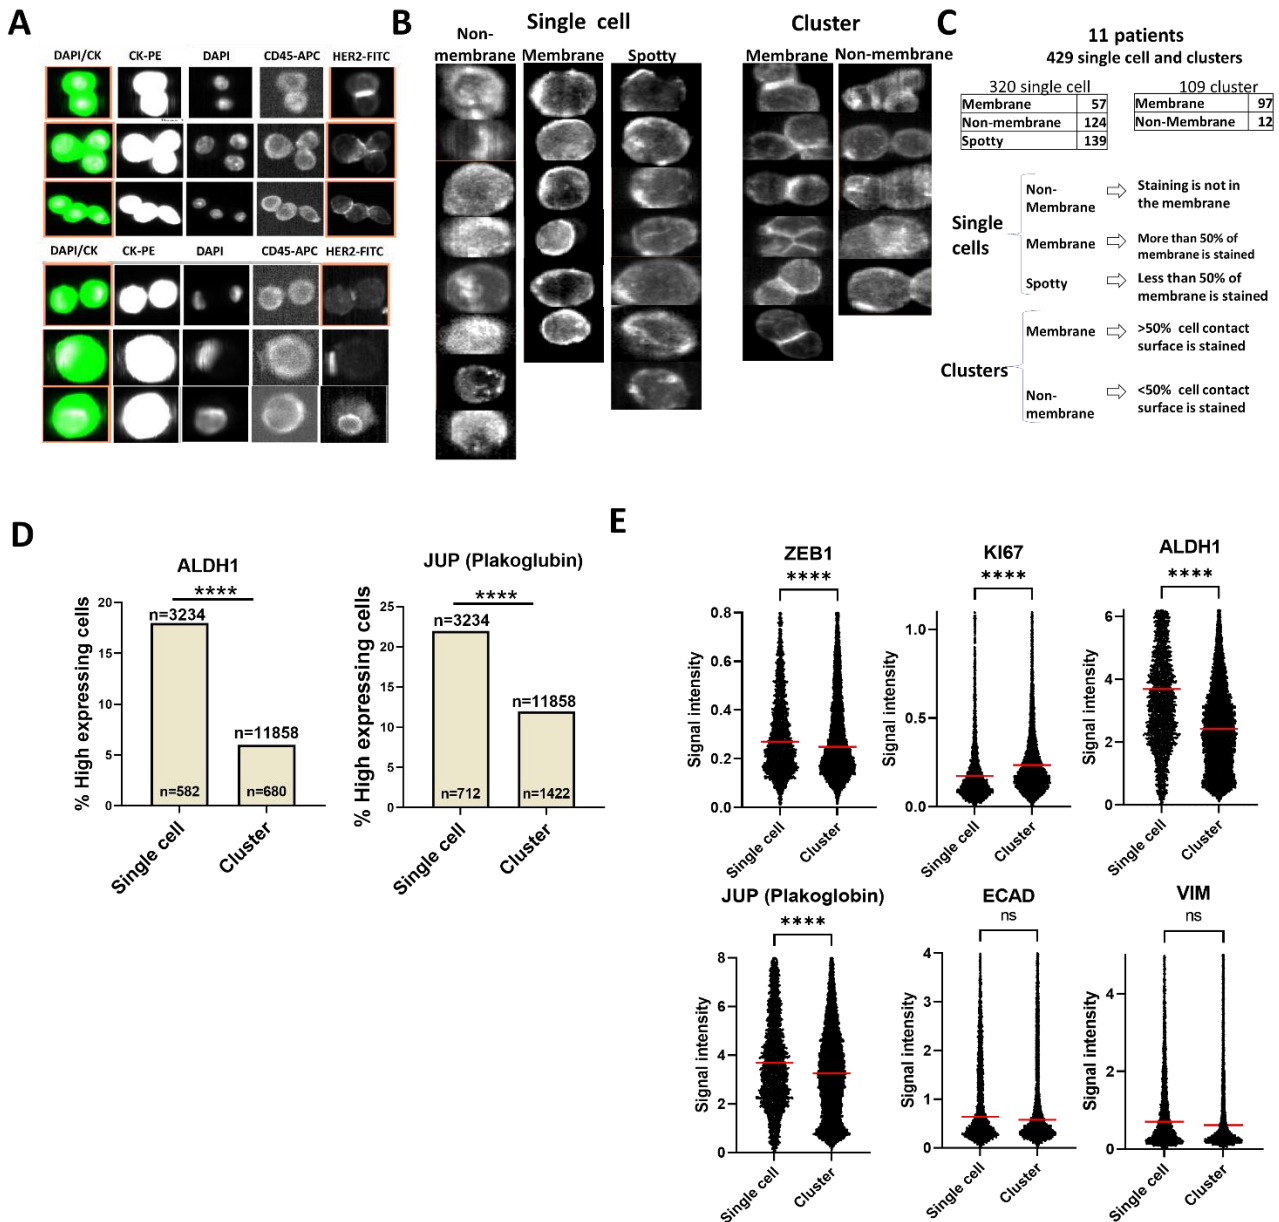

894

895 **Supplementary Figure 6: HER2 Localization in Circulating CTCs, Clusters, and Solitary Cancer Cells in PT and**  
 896 **Metastasis Lesions. A-C)** Analysis of 429 circulating tumor cells (CTCs) and clusters obtained from 32 HER2+  
 897 breast cancer patients with metastases (M1) using a cell search device to determine the cellular localization  
 898 status of HER2. Examples of CTCs and clusters with exclusive HER2 membrane staining on the cell-contact surface  
 899 of clusters and nuclear HER2 staining in one cell (A). Various examples of HER2 staining patterns are shown in  
 900 (B). Classification criteria for HER2 localization are shown in (C). **D)** Binary quantification of staining results of  
 901 imaging mass cytometry (IMC) for ALDH1 and JUP show percentages of high expressing cells for these two  
 902 proteins. **E)** Quantification of the staining signal for different markers used in IMC staining, including only CK-  
 903 positive cells. All p-values were calculated using the Mann-Whitney U test, and the data are presented as  
 904 medians.

905

906

907

## 908 **Supplementary Methods and materials:**

909

### 910 **Cell lines, cell culture and cell stimulation:**

911 Cell lines used in this study include 4T1 breast cancer cells, generously provided by Dr. Fred Miller from  
912 the Karmanos Cancer Institute in Detroit, MI. These cells originate from a spontaneous mammary  
913 tumour in a wild-type BALB/cfC3H mouse. The MM3MG mouse mammary epithelial cell line, derived  
914 from the BALB/c background, was procured from ATCC (ATCC® CRL6376™). Additionally, the TUBO cell  
915 line, a cloned cell line originating from a lobular carcinoma in a BALB-NeuT mouse, was a kind gift from  
916 Dr. Guido Forni at the University of Turin, Italy.

917 All mouse cell lines were cultured in DMEM medium (Anprotec:AC-LM-0011) supplemented  
918 with 10% fetal Bovine Serum (FBS (Pan Biotech: P40-37500)) (20% for the TUBO cell line), 2 mmol/L L-  
919 glutamine (Pan-Biotech: P04-80100), and 10 unit/ml penicillin/streptomycin (Pan-Biotech: P06-  
920 07050). Human cell lines were procured from ATCC and maintained according to ATCC's recommended  
921 culture conditions(MCF10A cells were cultured in DMEM F12(Anprotec:AC-LM-0018), supplemented  
922 with 2mM L-glutamine, 20ng/ml human Epidermal Growth Factor (hEGF(Sigma: E9644)), 100ng/ml  
923 cholera toxin(Enzo: BML-G117-0001), 10µg/ml bovine insulin(Sigma: I0516), 500ng/ml hydrocortisone  
924 (Sigma: H4001), 5% horse serum(Sigma: H1270) and 1% Penstrep. MCF7 and HCC-1806 cells were  
925 culture in RPMI 1640 medium (Anprotec:AC-LM-0060) supplemented with 10% FBS, 2 mmol/L L-  
926 glutamine (Pan-Biotech: P04-80100), and 10 unit/ml penicillin/streptomycin (Pan-Biotech: P06-  
927 07050). SKBR3, MDA-MB-231, MDA-MB-453, and HEK293T cells were cultured in DMEM High Glucose  
928 medium (Anprotec:AC-LM-0011) supplemented with 10% FBS (20% for the TUBO cell line), 2 mmol/L  
929 L-glutamine (Pan-Biotech: P04-80100), and 10 unit/ml penicillin/streptomycin (Pan-Biotech: P06-  
930 07050). The authenticity of the cell lines was verified through short tandem repeat (STR) analysis using  
931 Cell-ID™ (Promega).

932

933 Cultures were incubated at 37°C with 5% CO<sub>2</sub> and were regularly screened for mycoplasma  
934 contamination, with all tests returning negative. Inhibitors, U73122(S8011), GSK 2334470(S7087),  
935 Brefeldin A(S7046) were obtained from Selleckchem, and their resuspension and preparation followed  
936 the manufacturer's instructions, with working concentrations as specified in the text. TGF-β  
937 (Transforming Growth Factor-β1; Peprotech: 100-21) was used in 5 ng/ml working concentration and  
938 was refreshed every 24 hours. For siRNA treatments, siRNAs were purchased from siToolsBiotec, and  
939 lipofectamine-based transfections were conducted in accordance with the manufacturer's protocols.

940

### 941 **Cell density experiments:**

942 All cell lines, with the exception of MCF10A, were cultured at a density of 20,000 cells/cm<sup>2</sup> for high-  
943 density experiments and 500 cells/cm<sup>2</sup> for low-density experiments. In the case of MCF10A, a seeding  
944 density of 2,000 cells/cm<sup>2</sup> was used for low-density experiments, while a density of 20,000 cells/cm<sup>2</sup>  
945 was employed for high-density experiments. All density-related experiments were conducted over a  
946 72-hour period. For conditions requiring a shorter incubation time than our standard 72 hours (e.g.,  
947 24 hours), an increased initial seeding density was utilized to expedite the attainment of low and high  
948 cell densities, as mentioned in the results text.

949

### 950 **Cell-Cell contact inhibition experiment:**

951 The cells were dissociated and passed through 20 µm sieves and a total of 10<sup>6</sup> cells were cultured in  
952 20 ml of DMEM high glucose medium within ultra-low adherent 15 cm plates, which previously had

953 been pre-coated with 1.2% poly-HEMA (Sigma: P3932). To prevent cell-cell contact, the plates were  
954 subjected to continuous shaking at 70 RPM and incubated at 37°C with 5% CO<sub>2</sub> in a humid environment  
955 for a duration of 48 hours. Subsequently, 0.5 ml of medium containing the cell suspension was  
956 prepared for downstream experiments.

957

958 **Transwell Invasion assay:**

959 Transwell inserts (Corning: 3422) equipped with 8 µm pores were coated using a 40% Matrigel solution  
960 (Corning: 356231). A total of fifty thousand cells, sourced from tissue samples, were suspended in FBS-  
961 free medium before the seeding process. These cells were subsequently added to 200 µl of FBS-free  
962 medium (DMEM) on top of the Matrigel layer, while FBS medium (DMEM) was introduced into the  
963 lower chamber. After a 72-hour incubation period, the inserts were carefully removed, and were fixed  
964 by exposure to methanol at -20°C for 10 minutes, followed by staining with trypan blue. Enumeration  
965 of cells was performed by observing 3 fields (4x magnification) under a microscope.

966

967 **Cell motility assay:**

968 **Time-lapse imaging with the incubator-microscope zenCELL owl:** We performed live cell imaging using  
969 the 24-channel microscope zenCELL owl. This allowed us to monitor the different migration behaviour  
970 of cells in real time. Before starting cell monitoring, the culture medium was exchanged by fresh culture  
971 medium containing our target treatments. Cell motility was observed over 24 hours at 37°C and 5%  
972 CO<sub>2</sub> using the zenCELL owl system with the following settings: total time lapse imaging: 24 hours,  
973 interval: 10 minutes, exposure: 4, gain: 1, illumination: 43%, brightness: 58%. The recorded images of  
974 each experiment were processed and analysed as described in the following. MCF10A cells were  
975 cultured on the collagen surface treated plates (Roche 11179179001; 50 µg/ml, one hour coating). All  
976 cells were cultured 24 hours prior the start of experiment.

977 **Image Analysis:** Brightfield microscopy images captured from the zenCELL owl system for a period of  
978 24 hours were analysed in our image analysis pipeline. Most of the images had varying background as  
979 well as foreground illumination. Therefore, any standard threshold-based segmentation algorithm did  
980 not work right out of the box. We used a two-stage segmentation method combining machine learning  
981 (ML) with a thresholding-based algorithm. Further, the first few frames from each well were excluded  
982 as they had significant background artifacts and illumination effects due to initial automated camera  
983 adjustment. After segmentation, further post-processing on the segmented masks was done to remove  
984 cell debris, artifacts and cells touching the border of the image. Furthermore, in our analysis, we only  
985 kept cells that have a lifetime of at least 50 minutes, i.e., a cell should appear in 5 or more consecutive  
986 frames. By doing this, we were able to eliminate any remaining cell debris or artifacts that look very  
987 similar to a cell since most of these objects move very fast and they disappear from the camera frame.  
988 Finally, we used the cell segmentation masks as input to our cell tracking pipeline.

989 **Cell segmentation in ilastik:** We used the pixel classification workflow of ilastik [1] that assigns labels  
990 to pixels, based on pixel features and user annotations. In our workflow, we utilized various pixel  
991 features, such as pixel intensity, edge filters and texture descriptors at various smoothing levels. Once  
992 the features are selected, a random forest classifier is trained from user annotations. During the  
993 training process, annotations can be improved by using the live updates and results from the training  
994 process. In most cases, it was sufficient to train and annotate 1 to 2 images from each well depending  
995 on the variation of image illumination during the 24-hour time period. We did not use a trained image  
996 from one well to segment images of another well, as in most cases there was significant change in  
997 illumination and background artifacts per well. The workflow performs a semantic, rather than an  
998 instance segmentation and returns a probability map for each class, not individual objects. These  
999 probability maps are then processed by a threshold-based segmentation method in cellprofiler.

1000 **Cell segmentation in CellProfiler:** We used the probability maps generated by ilastik and used a global  
1001 threshold strategy on each image by applying the minimum cross-entropy algorithm in CellProfiler [2].  
1002 This provided us masks of each object from the images. To remove small cell debris from the  
1003 probability maps, we applied a 30-to-90-pixel threshold depending on the background as minimum  
1004 object diameter. We discarded objects that were touching the border of the image and subsequently  
1005 filled up holes in the identified objects post thresholding. The object masks obtained from cellprofiler  
1006 were then further processed in our cell tracking pipeline.

1007 **Cell tracking pipeline:** We track cells by a greedy overlap labelling method using the Jaccard index  
1008 between consecutive frames. The algorithm only looks in the forward direction of frames. This means  
1009 that only the next frame is seen by the algorithm for cells with the most overlap to track its path. From  
1010 the tracking algorithm, we get the x, y coordinates of the centre of mass of each cell. We also measure  
1011 morphological features like eccentricity, area and perimeter of each tracked cell for further analysis.  
1012 Once all the measurements are extracted, the average speed and total distance covered by each cell  
1013 are evaluated. We then compared control cell lines with treated cell lines by assessing the 20% fastest  
1014 moving cells between the two conditions. Thresholds like minimum number of frames a cell should  
1015 appear and per cell area were applied to get results from the most reliable cells depending on presence  
1016 of cell debris and background artifacts. In order to only compare moving single cells between control  
1017 and treatment conditions, we exclude objects having a large area to remove clusters of cells, mostly  
1018 resulting from cell division.

1019 **Protein Mass Spectrometry:**

1020 Mass spectrometry was essentially done as described previously (1). In summary proteins were  
1021 separated using a 4%–12% NUPAGE Bis-Tris gel with MOPS buffer and stained with Simply Blue  
1022 colloidal Coomassie blue G250. For mass spectrometric (MS) analysis, the gel lane was cut into slices,  
1023 washed with various solutions, and lyophilized. Cysteines were blocked with DTT and iodoacetamide,  
1024 followed by in-gel trypsin digestion. Peptides were eluted and reconstituted in 1% formic acid for LC-  
1025 MS/MS analysis on an UltiMate 3000 RSLCnano System coupled to a maXis plus UHR-QTOF System.  
1026 Data-dependent acquisition of MS/MS spectra was performed, and raw data processing involved  
1027 database searching of the UniProtKB/Swiss-Prot Homo sapiens database with specific parameters for  
1028 enzyme specificity, modifications, and tolerance values. Protein identification was facilitated using  
1029 software tools.

1030

1031 **Proliferation assay:**

1032 For the XTT assay, single-cell suspensions were cultured in 96-well plates (Corning Inc., Corning, NY,  
1033 USA), and cell proliferation was assessed using the XTT colorimetric assay kit (Roche: 11465015001),  
1034 following the manufacturer's instructions. The cell seeding density was 10000 cells/well, and the  
1035 experiment included 6 technical replicates. Media were supplemented with the relevant experimental  
1036 factors, inhibitors, or vehicle and were refreshed every other day.

1037         Given the limited sensitivity of XTT and several other commercial kits in detecting variations in  
1038 cell numbers under our low-density conditions, we opted to employ a straightforward cell counting  
1039 method utilizing ImageJ cell counter plugins.

1040

1041 **Immunohistochemistry:**

1042 For CK and HER2 immunohistochemistry staining in tissue, 5  $\mu$ m sections of paraffin blocks were  
1043 mounted onto poly-L-lysine-coated slides. The samples underwent dewaxing via two 5-minute washes  
1044 in xylene, followed by rehydration through graded alcohol with 5-minute wash steps and a final rinse



1045 in water. Antigen retrieval was carried out using a standard Tris-EDTA buffer and pressure-cooking.  
1046 Subsequently, sections were blocked with 0.3% H<sub>2</sub>O<sub>2</sub> in TBS and 10% normal goat serum.

1047 Sections were then subjected to a 1-hour incubation with the primary antibody, followed by  
1048 the addition of a secondary antibody (Vector lab: PK4001 or PK5000), as per the manufacturer's  
1049 recommended dilution (refer to AB table 2). After PBS washing, the ABC detection system (Vector  
1050 laboratory) was employed in accordance with the manufacturer's instructions. Visualization was  
1051 achieved using a chromogen reagent (Dako: 10046560) following the manufacturer's guidelines.

1052

1053 To quantify stained cells, the QuPath software was utilized, particularly its IHC positive staining  
1054 function. Furthermore, QuPath facilitated the measurement of CK staining cell density across the  
1055 stained area, a procedure carried out for EL and PT samples. For assessing cell contact numbers, five  
1056 representative CK staining images were generated for each condition, and cell contacts were manually  
1057 counted.

1058

#### 1059 **Immunofluorescence (IF) staining:**

1060 For staining of cells from monolayer cell culture, cells were initially seeded in 24-well culture plates at  
1061 an appropriate density. Following a 72-hour incubation period, the cells underwent washing with PBS  
1062 1x and were subsequently fixed using 4% PFA for 10 minutes and washed twice with PBS 1x. The cells  
1063 were then permeabilized with 0.3% Triton X-100 (Sigma: T8787) in TBS, followed by additional washing  
1064 steps by TBS 0,1% Triton X-100 and blocking with Goat Serum (DAKO #315) in TBS 0,1% Triton X-100 at  
1065 room temperature. Next, the cells were incubated with the primary antibody (please refer to  
1066 Supplementary Table 3 for details) for 1 hour at room temperature. Afterward, the cells underwent  
1067 three washes with TBS 0,1% Triton X-100 and were subsequently incubated with labelled secondary  
1068 antibodies (Jackson ImmunoResearch Laboratory Inc) for 1 hour at room temperature. For nuclear  
1069 counterstaining, the cells were incubated for 10 minutes with DAPI at a concentration of 0.5 µg/ml  
1070 (Sigma: 28718-90-3).

1071

1072 For staining of cells attached to the inserts from invasion experiments, inserts were used  
1073 immediately after migration (as described in the section detailing the invasion assay). The staining  
1074 process, including the blocking step and immunofluorescence staining, was carried out similar to the  
1075 monolayer cell culture staining procedure.

1076

1077 All images were captured using an AxioVert 200M microscope (Carl Zeiss Microscopy).  
1078 Additionally, for ER staining, the CytoPainter-ER Staining kit (ab139482) was employed, following the  
1079 instructions provided by the kit manufacturer.

1080

#### 1081 **Protein lipid overlay assay (PLO):**

1082 A Protein Lipid Overlay (PLO) assay was conducted to assess the binding interactions between various  
1083 lipid molecules, including PIP<sub>2</sub>, and specific proteins labeled with HIS tags. Commercially available PIP<sub>2</sub>  
1084 was bought from Sigma-Aldrich 850155P in dry powder and dissolved in chloroform/methanol/water  
1085 (20:9:1, v/v) (CMW solution) at a concentration of 1 mg/mL. Lipid spots containing PIP<sub>2</sub> were prepared  
1086 at different concentrations (0.01, 0.1, and 1 mg/ml) on a polyvinylidene fluoride (PVDF) membrane  
1087 and dried at room temperature for 30 to 60 min. The membranes were blocked with fresh sterile-  
1088 PBST blocking buffer ( 0.1% Tween 20, v/v + BSA 3% (sterile BSA), m/v in PBS) for 1h in RT. Peptides,  
1089 including ATK1 and AKT3 (biotrend), Sin1 (Biotechne), PDPK1 (MRC PPU reagent), all labeled with HIS  
1090 tags, were prepared in similar concentrations in sterile water and the membranes were incubated with



1091 2 ml peptide solution at 4 °C overnight. Following incubation with the proteins, membranes were  
1092 washed four times with fresh PBST for 10 min each time. Detection was achieved using His-HRP  
1093 (1:2000) in fresh sterile-PBST for 1 hour at room temperature antibody. Lipid-binding proteins bound  
1094 to the membrane were detected by enhanced chemiluminescence (ECL) according to the  
1095 manufacturer's instructions.  
1096

#### 1097 **Cell Fractionation:**

1098 Isolating the Cytoplasmic Fractionation: To begin, cells were resuspended in lysis buffer containing Tris  
1099 ultrapure: 50 mM (0.61 g), EDTA: 5 mM (1.86 g), NaCl: 137.5 mM (0.8 g), Igepal-CA630: 1% (1 ml),  
1100 Glycerol: 5% (5 ml). The supernatant from the cell suspension carefully transferred to a fresh tube,  
1101 leaving a small volume behind to prevent nuclear contamination. This initial supernatant is then  
1102 centrifuged at low speed and low temperature, allowing the cytoplasmic fraction to settle at the  
1103 bottom. The supernatant is transferred again, with another small volume reserved, and subjected to a  
1104 higher-speed centrifugation for an extended duration. This step results in the primary cytoplasmic  
1105 fraction.

1106 Nuclear Fraction Purification: The nuclear pellet the subjected purification process involves multiple  
1107 elegant washing and mild centrifugation steps aimed at removing contaminants and enhancing the  
1108 purity of the nuclear material. The nuclear material is then subjected to sonication and incubation on  
1109 ice. This treatment is designed to release the nuclear and ER (Nuclear Envelope + Endoplasmic  
1110 Reticulum) fraction. After the appropriate incubation period, one sample is designated as the Nuclear  
1111 + ER (NER) fraction, while another is centrifuged to obtain the nuclear fraction in its purified form.  
1112 Please note that a detailed bench protocol with precise quantities and instructions will be provided  
1113 upon request.

1114

#### 1115 **Quantitative PCR:**

1116 All mRNA extractions were performed using RNeasy kit (Macherey-Nagel:740955.50) according to  
1117 manufacturer's instructions. cDNA was generated using reverse transcriptase kit (ThermoFisher:  
1118 k1622). Finally, 5 ng of cDNA was used for qPCR. Quantitative PCR was performed using a LightCycler  
1119 instrument (Roche) and Fast Start Master SYBR Green Kits (Roche). Data analysis was done using the  
1120 RelQuant software (Roche) with a reference gene and a calibrator (reference) sample in every run.  
1121 Mouse and human reference cDNA served as a positive control. Measurements that showed unspecific  
1122 products in the melting curve analysis were discarded from further analysis. Expression levels are given  
1123 relative to *Actb* ( $\beta$ -actin) for gene expression analyses (primer sequences are provided in Table 3). All  
1124 primers were synthesized by Eurofins MWG Operon, Germany.  
1125

#### 1126 **Lenti- and retroviral transduction:**

1127 Overexpression, including shRNA, PH-PDPK1, PLC, and DSG2 expressions, were accomplished through  
1128 lentiviral constructs obtained from Vector Builder, utilizing a pLV-expression-based system. For the tet-  
1129 inducible model, a custom construct was created based on the pLVX-TRE-IRES-Puro backbone (vector  
1130 maps are provided in the figures for Tet-inducible constructs). Lentiviral packaging followed previously  
1131 established protocols(2), with helper vectors pSPAX2 and pMD2.G (Addgene). Selection of transduced  
1132 cells was carried out using the selective antibiotics with proper concentration for each cell line.  
1133 MCF10A-teti-Her2\_GFP cells with 10  $\mu$ g/ml of puromycin (Sigma Aldrich: P8833), MCF10A-teti-  
1134 Her2\_GFP, MCF7, and SKBR3 with 150, 500 and 1000  $\mu$ g/ml of G418 (Sigma Aldrich: G9516)  
1135 respectively. MCF10A-teti-Her2\_GFP and MCF7 with 200 and 400  $\mu$ g/mL of hygromycin (Sigma H9773)  
1136 respectively.

1137  
1138  
1139  
1140  
1141  
1142  
1143  
1144  
1145  
1146  
1147  
1148  
1149  
1150  
1151  
1152  
1153  
1154  
1155  
1156  
1157  
1158  
1159  
1160  
1161  
1162  
1163  
1164  
1165  
1166  
1167  
1168  
1169  
1170  
1171  
1172  
1173  
1174  
1175  
1176  
1177  
1178  
1179  
1180  
1181  
1182  
1183  
1184

For the inducible model, Doxycycline (Sigma D9891) treatments were administered every two days, with fresh medium containing Doxycycline used at various concentrations depending on the experimental objectives.

#### **Western blot analysis and Co-immunoprecipitation (Co-IP):**

Cell lysis was performed by resuspending cells in a lysis buffer containing the following components: Tris ultrapure (0.61 g, 50 mM), EDTA (1.86 g, 5 mM), NaCl (0.8 g, 137.5 mM), Igepal-CA630 (1 ml, 1%), and Glycerol (5 ml, 5%), with a 30-minute incubation on ice. Protein extraction was achieved through centrifugation at 14,000 RPM. The resulting supernatant, containing the extracted proteins, underwent quantification using the BCA protein assay kit (Thermo Scientific: 23227) to ensure uniform protein concentration.

Subsequently, the quantified protein lysates were separated on different percentages of SDS-PAGE gels, depending on the size of the target protein, transferred onto PVDF (Millipore, Billerica, MA, USA), and subjected to immunoblotting using primary antibodies overnight. Following this, horseradish peroxidase-conjugated secondary antibodies were applied. Visualization of protein bands was accomplished using enhanced chemiluminescence (ECL) according to the manufacturer's instructions, and bands were detected using Imagequant LAS 4000 (GE Healthcare).

For Co-IP experiments, the Crosslink IP Kit (26147 Pierce™ Crosslink IP Kit) was employed following the manufacturer's instructions. Initially, 10 µg of the antibody was coupled with resin slurry, and the resin was washed with Coupling Buffer. After confirming successful antibody coupling, the resin was further washed, and a crosslinking solution was prepared and added to chemically attach the antibody to the beads using DSS solution. Following the crosslinking reaction, the resin was washed again, and immunoprecipitation was carried out.

#### **Imaging Mass Cytometry (IMC):**

TMA section including 14 FFPE PT and metastasis samples from 6 M1 breast cancer patients with HER2 positive PT status (Table1) was cut in 5 µm slides. Samples were collected based on consent form approved by ethics committee (Ethics vote Numbers: 07-079 V1, 07-079 V2, 17-672-101 V2) of the University of Regensburg. These slides baked for 2h at 60°C prior to tissue pretreatment and antigen retrieval in Ventana Discovery Ultra Platform (Ventana Medical Systems Inc. Tucson, Arizona, USA). After pretreatment in Ventana, the TMA section was first washed 3 times in warm soap water and again 3 times in clean warm water to remove LCS (liquid cover slip (650-010), Roche Diagnostics GmbH, Mannheim, Germany). Following this, tissue was blocked for 45 min at RT in a humidity chamber using blocking solution (3% of BSA solution in phosphate saline buffer (PBS)) and then stained using an antibody cocktail overnight in a humidity chamber at 4°C. The antibody cocktail consisted of anti-PanKeratin antibody (clone AE-1/AE-3, 1:800, Standard BioTools, San Francisco, CA, USA), anti-vimentin (clone D21H3, 1:400, Standard BioTools), anti-gamma-catenin (clone 15F11, 1:100, BioLegend, San Diego, California, USA), anti-ALDH1 (clone 44/ALDH, 1:100, Bd Bioscience, San Jose, California, USA), anti-E cadherin (clone 24E10, 1:200, Standard BioTools), anti-HER2 (clone D8F12, 1:150, Cell Signaling Technology, Danvers, MA, USA), anti-Ki67 (clone B56, 1:100, Standard BioTools), and anti-Zeb1 (clone E2G6Y, 1:50, Cell Signaling Technology) dissolved in 0.5% BSA PBS solution. After incubation overnight, the slide was washed two times using a PBS solution of 0.2% Triton x-100 (Sigma-Aldrich, Saint-Louis, Missouri, USA) for a duration of 8 min and then again for another 8 min using MiliQ water. After the wash, nuclear staining was performed using the iridium intercalator diluted in PBS (1:4000, Standard BioTools) for 30 min at RT. Following nuclear staining, the slide was washed for 5

1185 min in MiliQ water and air dried for at least 20 min at RT before image data were acquired using a  
1186 Hyperion Imaging System (Standard BioTools).

1187

1188 **IMC data analysis:**

1189 Obtained IMC data were first pre-processed as previously described by Windhager et al.  
1190 (10.1101/2021.11.12.468357) in order to obtain .tiff files which were then corrected for signal spillover  
1191 as described previously(3) . The prepared image datasets were then loaded in QuPath for further  
1192 analysis(4). To simplify the analysis process, tiff images were first stacked using a Python script to  
1193 consist of only those channels in use for each analysis session. In the first session, HER2, PanKeratin,  
1194 and iridium channels were used. Cell segmentation was performed on the base of the signal in the  
1195 iridium channel by using a built-in cell detection function, and then the object classifier was trained  
1196 using HER2 and PanKeratin channels and cell measurements (area, perimeter, eccentricity, minimal  
1197 and maximal perimeter, and nucleus/cell area ratio) in order to detect 5 different cell types (solitary  
1198 cancer cells with HER2 localized predominantly on the membrane and in the cytoplasm, clustered  
1199 cancer cells with HER2 localized predominantly on the membrane and in the cytoplasm, and non-  
1200 cancer cells). Annotations were exported in the form of GeoJSON files and used in the second session  
1201 together with stacked tiff files consisting of the rest of the channels (E-Cadherin, Vimentin, ZEB1,  
1202 ALDH1, KI67, and Gamma-catenin). In the second session, the mean signal intensity was measured for  
1203 each of the channels, and as the measurements were performed on the top of annotations from the  
1204 first session, also for each of the cell types identified in the first session. The obtained data was capped  
1205 using an R script to remove the outliers. In order to divide cells based on the ZEB1 and KI67 expression  
1206 as positive or negative for these markers, staining intensity was manually evaluated for each image in  
1207 order to determine individual thresholds. This step was performed in the third QuPath session, using  
1208 a single measurement classifier, where the patterns of positive cells were followed in real-time while  
1209 adjusting the threshold values for each marker and compared with real staining. These thresholds were  
1210 then used in R script to binarize the KI67 and ZEB1 intensities into ZEB1 and KI67 positive and negative  
1211 cell populations that were then used in further analysis. The images were prepared for visualization by  
1212 using IMC denoise pipeline as described in work by Lu et al(5).

1213

1214 **Bioinformatic and Statistical analysis:**

1215 Statistical analyses and assessment of data variation within each dataset were conducted using  
1216 GraphPad Prism V9.5. All in vitro and primary culture experiments were independently performed at  
1217 least in three replicates, and comparisons were carried out using the student's t-test. Pearson  
1218 correlation tests were employed to assess correlations between traits depicted in graphs. When  
1219 comparing numerical values across different groups, Fisher's exact or chi-square tests were utilized.

1220 To determine the appropriateness of parametric or non-parametric tests, D'Agostino  
1221 normality tests were conducted. For assessing mean differences among groups of three or more,  
1222 Anova tests were applied. All p-values presented in the figures and legends are two-tailed. Correlation  
1223 analyses involving different staining were executed using CellProfiler (V4.2.1) software, and detailed  
1224 pipelines and example images are available upon request.

1225

1226 **References**

1227

- 1228 1. D. Hasler *et al.*, The Alzami Syndrome-Associated Protein LARP7 Guides U6 Small Nuclear RNA  
1229 Modification and Contributes to Splicing Robustness. *Molecular cell* **77**, 1014-1031.e1013  
1230 (2020).
- 1231 2. S. A. Stewart *et al.*, Lentivirus-delivered stable gene silencing by RNAi in primary cells. *Rna* **9**,  
1232 493-501 (2003).
- 1233 3. S. Chevrier *et al.*, Compensation of Signal Spillover in Suspension and Imaging Mass Cytometry.  
1234 *Cell systems* **6**, 612-620.e615 (2018).
- 1235 4. M. P. Humphries, P. Maxwell, M. Salto-Tellez, QuPath: The global impact of an open source  
1236 digital pathology system. *Computational and structural biotechnology journal* **19**, 852-859  
1237 (2021).
- 1238 5. P. Lu *et al.*, IMC-Denoise: a content aware denoising pipeline to enhance Imaging Mass  
1239 Cytometry. *Nature Communications* **14**, 1601 (2023).

1240

1241

1242

1243

1244

1245

1246

1247

1248

1249

1250

1251

1252

1253

1254

1255

1256

1257

1258

1259

1260

1261

1262

1263

1264

1265

1266

1267

1268

1269

1270

1271 Supplementary Table 1: List of human patient samples used for IMC analyses.

1272

1273

1274

1275

1276

1277

1278

1279

1280

1281

1282

1283

1284

1285

1286

1287

1288

1289

1290

1291

1292

1293

1294

1295

1296

1297

1298

1299

1300

1301

| PT/Met matched | ID-Nummer | ample type             |
|----------------|-----------|------------------------|
| 1              | 1         | Peritoneum cell pellet |
| 1              | 2         | Bladder Met            |
| 2              | 3         | Skin Biopsy            |
| 3              | 4         | Mammary Punch          |
| 3              | 5         | LN                     |
| 3              | 6         | Axillary Met           |
| 3              | 7         | Pericardial            |
| 3              | 8         | Pleural Effusion       |
| 4              | 9         | Mammary Biopsy         |
| 4              | 10        | LN                     |
| 5              | 11        | LN                     |
| 5              | 12        | Pleural Effusion       |
| 6              | 13        | LN                     |
| 6              | 14        | PT                     |



1302

1303 Supplementary Table 2: List of Antibodies

| Antibody                   | Company (Cat-Nr)           | Conc for WB         |
|----------------------------|----------------------------|---------------------|
| DSP                        | Proteintech 25318-I-AF     | 1:200               |
| Phospho Her2               | Affinity AF3069            | 1:500               |
| HER2                       | Cell Signal 2165           | 1:250 WB, IF, IP    |
| HER2                       | Thermofisher PA516305      | 1:250 WB, IF        |
| Her2                       | Thermofisher MA5-15050     | 1:100 IF            |
| Phospho PLC                | Cell Signal 2821S          | 1:200 WB            |
| PLC                        | Cell Signal 5690S          | 1:250 WB            |
| E-Cadherin                 | BioLegend 8866702          | 1:250 WB            |
| Lamin-B                    | Proteintech 66095-I-Ig     | 1:5000 WB, 1:200 IF |
| Phospho PDK1               | Cell Signal 3061S          | 1:500 WB            |
| PDK1                       | Cell Signal 3062S          | 1:250 WB            |
| Phospho AKT                | Cell signaling 4060        | 1:250 WB            |
| Tubulin                    | Sigma T9026                | 1:10 000 WB         |
| Vimentin                   | Cell Signal 5741S          | 1:500 WB            |
| Total AKT                  | Cell signalling 2920       | 1:2000 WB           |
| $\beta$ -Actin             | Sigma Aldrich A5441        | 1:5000 WB           |
| Erk1/2                     | Cell signalling 4695       | 1:1000 WB           |
| p-Erk1/2                   | Cell signalling 9106       | 1:1000 WB           |
| AKT1                       | Cell signalling 2938       | 1:1000 WB           |
| AKT2                       | Cell signalling 3063       | 1:1000 WB           |
| AKT3                       | Cell signalling 8018       | 1:1000 WB           |
| Pan-AKT                    | Cell signalling 4691       | 1:1000 WB           |
| Sin1                       | Cell signaling 12860S      | 1:1000 WB           |
| Phospho-Sin1               | Cell signaling 14716S      | 1:1000 WB           |
| Rab1A                      | Cellsignaling D3X9S        | 1:125 WB            |
| Calnexin                   | Proteintech10427-2-AP      | 1:4000 WB           |
| N-cadherin                 | Proteintech 22018-1-AP     | 1:5000 WB           |
| Sec24A                     | Invitrogen PA5-100110      | 1:1000 WB           |
| Phospho PLC gama1          | Cellsignalling 8713        | 1:1000 WB           |
| DSC2                       | Proteintech                | 1:1000 WB, 1:200 IF |
| Alpha-catenin              | Thermofisher               | 1:250 WB            |
| Beta-catenin               | epitmics                   | 1:125 WB            |
| Anti-Mouse IgG Peroxidase  | Sigma A8924-.5ML           | 1:3000 WB           |
| Anti-Rabbit IgG Peroxidase | Sigma A0545-1ML            | 1:5000 WB           |
| KI67                       | Thermofisher MA5-14520     | 1:250 WB, IF        |
| DSG2                       | Proteintech 21880-1-AP     | 1:250 WB, IF        |
| PIP2                       | Echelon Biosciences Z-P045 | 1:100 IF            |
| PIP3                       | Echelon Biosciences Z-A345 | 1:100 IF            |
| Anti-His-tag-HRP           | Proteintech HRP-66005      | 1:1000 WB           |

1304

1305

1306

1307

1308

1309

1310 Supplementary Table 3: List of qPCR primers:

| Name      | Sequence For             | Sequence Rev               | Species |
|-----------|--------------------------|----------------------------|---------|
| PDK1      | GAAGCAGTTCCTGGACTTCG     | ACCAATTGAACGGATGGTGT       | human   |
| AKT1      | TCTATGGCGCTGAGATTGTG     | CTTAATGTGCC GTCCTTGT       | human   |
| AKT2      | TGAAAACCTTCTGTGGGACC     | TGGTCTGGTTGTAGAAGGG        | human   |
| AKT3      | TGAAGTGGCACACACTCTA ACT  | CCGCTCTCTCGACAAATGGA       | human   |
| Sin1      | CAGGACAGACTGCTGCCAATGA   | GGCAGTAGGCACTGACATTGTC     | human   |
| PCNA      | TCCTCCTTCCCGCCTGCCTGTAGC | CGCGTTATCTTCGGCCCTTAGTGTA  | human   |
| Ki67      | TGAAGATGCAGCTGACTCTG     | AGCACTCTGTAGGGTCGAG        | human   |
| Cdh1      | TGATTTTTCGGCAGTTC AAGC   | ACAATTATCAGCACCCACACA      | human   |
| CK 18 III | TATCACACGACTGCAGCTGG     | GATGTCTGCCATGATCTTGG       | human   |
| CK 18     | GTTCTGCAGATTGACAATGCC    | GTCATCAATGACCTTGCGGA       | human   |
| Krt8      | GATCTCTGAGATGAACCGGAACA  | GCTCGGCATCTGCAATGG         | human   |
| Cdh2      | TGGGAATCCGACGAATGG       | TGCAGATCGGACCGGATACT       | human   |
| Zeb1      | GAAAAACCACAAGGGGATGAG    | GCTTGACTTTCAGCCCTGTC       | human   |
| Zeb2      | CCTGCTACTTTCATGCCACC     | CCATCAAGCAATTCTCCCTGA      | human   |
| Snail 1   | CTGCCAATGCTCATCTGGGACTCT | TTGAA GGGCTTTCGAGCCTGGAGAT | human   |
| Snail2    | ACATGTCGGTTGTCTGGTTG     | CGCCAGGAATGTTCAAAGCT       | human   |
| TWIST 1   | CAGCGCACCCAGTCGCTGAA     | CTTGTCGAGGGCAGCGTGG        | human   |
| TWIST2    | AGCAAGAAGTCGAGCGAAGA     | CAGCTTGAGCGTCTGGATCT       | human   |
| FN1       | CGGTGGCTGTCAGTCAAAG      | AAACCTCGGCTTCTCCATAA       | human   |
| Vimentin  | ACTTTGCCGTTGAAGCTGCTA    | AAATCTATCTTGCCTCCTGA       | human   |
| Nanog     | GCTGGTTGCCTCATGTTATTATGC | CCATGGAGGAAGGAAGAGGAGAGA   | human   |
| OCT4      | TTTTGGTACCCAGGCTATG      | GCAGGCACCTCAGTTTGAAT       | human   |
| Snail3    | AAATCA ATGGTGCCTGCTCT    | GGCTGTCTTTGAGGGGTA         | human   |
| DSC1      | TGATGGAGA AACTCGTTGGGTC  | CCTGGCCCACTTATGGAATAAAA    | human   |
| DSC2      | TGTA CTGCTCTGTAGATCGTG   | AGTGCCCACTCTGCAATTTTC      | human   |
| DSC3      | TTCTCAGGCGTGCCAAGAG      | ACTCCACGTCCACTTATTGAGTA    | human   |
| DSG1      | AACCCAATCGCCAAAATTC ACT  | ACCTCTCGATCAACTATGGATGT    | human   |
| DSG2      | CTAACAGGTTACGCTTTGGATGC  | GTGAACACTGGTTCGTTGTCAT     | human   |
| DSG3      | GCAAAAACGTGAATGGGTGAAA   | TCCAGAGATTCGGTAGGTGATT     | human   |
| PKP1      | GACCAGGACA AACTCCACGTT   | CTGCTGGTGGTCCCATGTT        | human   |
| PKP2      | GTGGGCAACGGAAATCTTCAC    | CCAGCCTTAGCATGTCATAGG      | human   |
| PKP3      | GGCCGACTATGACACACTCTC    | CTCGGGGAAACCTCAGTGG        | human   |
| PG        | TCGCCATCTTCAAGTCGGG      | AGGGGCACCATCTTTTG CAG      | human   |
| DSP       | TTTGGG CAGTAGCATGGGC     | CCATCTTGGGTATTCTCTTG CCT   | human   |
| CLDN1     | CCCTATGACCC CAGTCAATG    | GTTTTGGATAGGGCCTTGGT       | human   |
| OCLN      | ATGGCAAAGTGAATGACAAGCGG  | CTGTAACGAGGCTGCCTGAAGT     | human   |
| MMP9      | GGGACGCAGACATCGTCATC     | TCGTCATCGTCGAAATGGGC       | human   |
| MMP14     | GCAGAAGTTTTACGGCTTGCAA   | CCTTCGAACATTGGCCTTGAT      | human   |
| MMP2      | ATAACCTGGATGCCGTCGT      | AGGCACCTTGAAGAAGTAGC       | human   |
| PCNA      | TCCTCCTTCCCGCCTGCCTGTAGC | CGCGTTATCTTCGGCCCTTAGTGTA  | human   |
| KI67      | TGAAGATGCAGCTGACTCTG     | AGCACTCTGTAGGGTCGAG        | human   |
| B-actin   | TGGACATCCGCAAAGACCTG     | GGGTGTAACGCAACTAAGTCAT     | human   |

1311
